## RESEARCH ARTICLE

NCX1 represents an ionic Na<sup>+</sup> sensing mechanism in macrophages

Patrick Neubert<sup>1</sup>, Arne Homann<sup>1</sup>, David Wendelborn<sup>1</sup>, Anna-Lorena Bär<sup>1</sup>, Luka Krampert<sup>1</sup>, Maximilian Trum<sup>2</sup>, Agnes Schröder<sup>3</sup>, Stefan Ebner<sup>1,4</sup>, Andrea Weichselbaum<sup>1</sup>, Valentin Schatz<sup>1</sup>, Peter Linz<sup>5</sup>, Roland Veelken<sup>6</sup>, Jonas Schulte-Schrepping<sup>7</sup>, Anna C. Aschenbrenner<sup>7,8</sup>, Thomas Quast<sup>9</sup>, Christian Kurts<sup>10</sup>, Sabrina Geisberger<sup>11,12</sup>, Karl Kunzelmann<sup>13</sup>, Karin Hammer<sup>12</sup>, Katrina J. Binger<sup>14</sup>, Jens Titze<sup>15</sup>, Dominik N. Müller<sup>11,12</sup>, Waldemar Kolanus<sup>9</sup>, Joachim L. Schultze<sup>7,16</sup>, Stefan Wagner<sup>12</sup>, Jonathan Jantsch<sup>1\*</sup>

**1** Institute of Clinical Microbiology and Hygiene, University Hospital of Regensburg and University of Regensburg, Regensburg, Germany, **2** Department of Internal Medicine II, University Hospital of Regensburg and University of Regensburg, Regensburg, Germany, **3** Institute of Orthodontics, University Hospital of Regensburg, Regensburg, Germany, **4** Max Planck Institute of Biochemistry, Martinsried, Germany, **5** Institute of Radiology, University Hospital Erlangen, Friedrich-Alexander-Universität Erlangen-Nürnberg (FAU), Erlangen, Germany, **6** Department of Internal Medicine 4, University Hospital Erlangen, Erlangen, Germany, **7** Department for Genomics and Immunoregulation, Life and Medical Sciences (LIMES) Institute, University of Bonn, Bonn, Germany, **8** Department of Internal Medicine and Radboud Center for Infectious Diseases (RCI), Radboud University Medical Center, Nijmegen, the Netherlands, **9** Molecular Immunology and Cell Biology LIMES Institute, University of Bonn, Bonn, Germany, **10** Institute of Experimental Immunology, University of Bonn, Bonn, Germany, **11** Experimental and Clinical Research Center (ECRC), a cooperation of Charité-Universitätsmedizin Berlin and Max Delbrück Center for Molecular Medicine, Berlin, Germany, **12** Max Delbrück Center for Molecular Medicine in the Helmholtz Association (MDC), Berlin, Germany, **13** Institute of Physiology, University of Regensburg, Regensburg, Germany, **14** Department of Biochemistry and Genetics, La Trobe Institute for Molecular Science, La Trobe University, Bundoora, Australia, **15** Cardiovascular and Metabolic Disorders, Duke-NUS Medical School, Singapore, **16** Platform for Single Cell Genomics & Epigenomics at the German Center for Neurodegenerative Diseases (DZNE) and the University of Bonn, Bonn, Germany

☯ These authors contributed equally to this work.

\* [JonathanJantsch@ukr.de](mailto:JonathanJantsch@ukr.de)

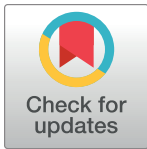

## OPEN ACCESS

**Citation:** Neubert P, Homann A, Wendelborn D, Bär A-L, Krampert L, Trum M, et al. (2020) NCX1 represents an ionic Na<sup>+</sup> sensing mechanism in macrophages. *PLoS Biol* 18(6): e3000722. <https://doi.org/10.1371/journal.pbio.3000722>

**Academic Editor:** Paula M. Oliver, Children's Hospital of Philadelphia and The University of Pennsylvania School of Medicine, UNITED STATES

**Received:** October 31, 2019

**Accepted:** May 22, 2020

**Published:** June 22, 2020

**Copyright:** © 2020 Neubert et al. This is an open access article distributed under the terms of the [Creative Commons Attribution License](https://creativecommons.org/licenses/by/4.0/), which permits unrestricted use, distribution, and reproduction in any medium, provided the original author and source are credited.

**Data Availability Statement:** All relevant data are within the paper and its supporting information files ([S1 Data](#), [S1 Blots](#)). The RNA-seq data was deposited in the Gene Expression Omnibus (GEO) database (<https://www.ncbi.nlm.nih.gov>). The accession number is GSE136662.

**Funding:** JJ received funding from the DFG (JA1993/6-1) and DFG SFB 1350 grant (project nr. 387509280, TPB5). SW is funded by DFG grants WA 2539/4-1, 5-1, and 7-1, by a DFG SFB 1350 grant (project nr. 387509280, TPA6), and by the

## Abstract

Inflammation and infection can trigger local tissue Na<sup>+</sup> accumulation. This Na<sup>+</sup>-rich environment boosts proinflammatory activation of monocyte/macrophage-like cells (MΦs) and their antimicrobial activity. Enhanced Na<sup>+</sup>-driven MΦ function requires the osmoprotective transcription factor nuclear factor of activated T cells 5 (NFAT5), which augments nitric oxide (NO) production and contributes to increased autophagy. However, the mechanism of Na<sup>+</sup> sensing in MΦs remained unclear. High extracellular Na<sup>+</sup> levels (high salt [HS]) trigger a substantial Na<sup>+</sup> influx and Ca<sup>2+</sup> loss. Here, we show that the Na<sup>+</sup>/Ca<sup>2+</sup> exchanger 1 (NCX1, also known as solute carrier family 8 member A1 [SLC8A1]) plays a critical role in HS-triggered Na<sup>+</sup> influx, concomitant Ca<sup>2+</sup> efflux, and subsequent augmented NFAT5 accumulation. Moreover, interfering with NCX1 activity impairs HS-boosted inflammatory signaling, infection-triggered autolysosome formation, and subsequent antibacterial activity. Taken together, this demonstrates that NCX1 is able to sense Na<sup>+</sup> and is required for amplifying inflammatory and antimicrobial MΦ responses upon HS exposure. Manipulating NCX1 offers a new strategy to regulate MΦ function.

Deutsches Zentrum für Herz-Kreislauf-Forschung ([DZHK]; German Center for Cardiovascular Research). JJ, SW, and KH are supported by the ReForM C program of the Medical Faculty University of Regensburg. JLS received funding from the DFG under Germany's Excellence Strategy – EXC2151 – 390873048 and the EU under project SYSCID (grant nr. 733100). DNM is supported by the DZHK and the DFG (SFB 1365). The funders had no role in the study design, data collection and analysis, decision to publish, or preparation of the manuscript.

**Competing interests:** The authors have declared that no competing interests exist.

**Abbreviations:** BMDM, bone marrow–derived MΦ;  $[Ca^{2+}]_i$ , intracellular  $Ca^{2+}$  in situ; Erev, reversal potential; GFP, green fluorescent protein; HS, high salt; KB-R, KB-R7943 mesylate; LPS, lipopolysaccharide; MΦ, monocyte/macrophage-like cell; mLC3, microtubule-associated protein 1 light chain 3;  $[Na^+]_i$ , intracellular  $Na^+$  in situ; NCBI, National Center for Biotechnology Information; NCX,  $Na^+/Ca^{2+}$  exchanger; NFAT5, nuclear factor of activated T cells 5; NO, nitric oxide; NS, normal salt; ns, nonsilencing; NOS2, nitric oxide synthase 2; ORF, open reading frame; qRT-PCR, quantitative real-time PCR; RFP, red fluorescent protein; RNAi, RNA interference; RNA-seq, RNA sequencing; ROS, reactive oxygen species; SBFI, sodium-binding benzofuran isophthalate; SEA, SEA 0400; siRNA, small interfering RNA; SLC8, solute carrier family 8; Tg, thapsigargin; TRPV4, transient receptor potential cation channel subfamily V member 4; UTR, untranslated region;  $V_m$ , membrane potential.

## Introduction

Infection and inflammation can trigger localized accumulation of sodium ( $Na^+$ ) in skin [1–3]. This accumulation is similar to that induced by high- $Na^+$ -containing diets and increases the effective osmolyte concentration within the skin to more than 40 mM above that of normal, isotonic blood [1,4].

Although blood  $Na^+$  is tightly regulated by the kidney, it has been established that monocyte/macrophage-like cells (MΦs) are necessary for the clearance of skin electrolytes upon dietary high-salt (HS) challenges [4,5]. However, the precise molecular mechanisms that orchestrate  $Na^+$  accumulation in the skin remain elusive, clearance by MΦs requires the osmo-protective transcription factor nuclear factor of activated T cells 5 (NFAT5) [4,6], which is the calcineurin-independent member of the NFAT family (reviewed in [7,8]).

In addition to regulating skin  $Na^+$  levels, the response of MΦs to infection and/or inflammation is modulated by increased local  $Na^+$  levels. Increases in  $Na^+$  limit anti-inflammatory regulatory MΦ activation while amplifying proinflammatory and antimicrobial activity [1,9–15]. We have shown that high  $Na^+$  increases NFAT5-dependent nitric oxide synthase 2 (*Nos2*) expression in lipopolysaccharide (LPS)-activated MΦs, resulting in increased antimicrobial nitric oxide (NO) production. High- $Na^+$  conditions also enhanced autolysosome formation of infected MΦs, which together with increased NO, ultimately facilitates increased antimicrobial responses [1,10]. Although these findings established that alterations in local  $Na^+$  influence MΦ biology, the initial molecular responses of MΦs to high- $Na^+$  environments remain unclear.

Here, we demonstrate that exposure to high extracellular  $Na^+$  stimulates the MΦ  $Na^+/Ca^{2+}$  exchanger 1 (NCX1, also known as solute carrier family 8 member A1 [SLC8A1]), resulting in  $Na^+$  influx and  $Ca^{2+}$  efflux. We show that these NCX1-dependent currents are required for  $Na^+$ -increased proinflammatory MΦ activity. Altogether, this study identifies a new molecule important for MΦs to sense increases in local  $Na^+$  levels and regulate their biology.

## Results

### Elevated extracellular $Na^+$ triggers $Na^+$ influx into MΦs

The elevated levels of extracellular skin  $Na^+$  can be mimicked in vitro by the addition of 40 mM NaCl to standard cell culture media [1,4,10,11]. We exposed MΦs to increased extracellular  $Na^+$  (+40 mM NaCl; +80 mOsm/kg; HS). Chemical analysis of  $Na^+$  content revealed that HS substantially increased cellular  $Na^+$  levels compared with normal salt (NS) in an LPS-independent manner (Fig 1A). To monitor intracellular  $Na^+$  in situ ( $[Na^+]_i$ ), we used MΦs loaded with the  $Na^+$ -sensitive dye sodium-binding benzofuran isophthalate (SBFI). LPS stimulation alone did not alter  $[Na^+]_i$ . HS exposure, however, resulted in an immediate increase in  $[Na^+]_i$  in the absence or presence of LPS (Fig 1B). Of note, the osmolality control urea did not trigger substantial  $Na^+$  entry into MΦs (Fig 1C).

We hypothesized that one (or more) proteins at the plasma membrane might mediate HS-triggered  $Na^+$  influx. A query in the ImmGen database [16] revealed that mouse MΦs express transcripts for several ion channels, exchangers, and transporters, which are able to facilitate  $Na^+$  entry. This list includes the epithelial  $Na^+$  channel 1 alpha subunit,  $Na^+/H^+$  antiporter, the voltage-gated  $Na^+$  channel, acid-sensing ion channels,  $Na^+-K^+-Cl^-$  symporter, and NCX1 (*Slc8a1*). In addition, HS-triggered signaling might also depend on transient receptor potential cation channel subfamily V member 4 (TRPV4). To measure whether  $Na^+$  influx by one of these molecules is involved in HS-boosted inflammatory (i.e., LPS-induced) MΦ activation, we used selective inhibitors targeting these molecules (S1 Table) and quantified NO

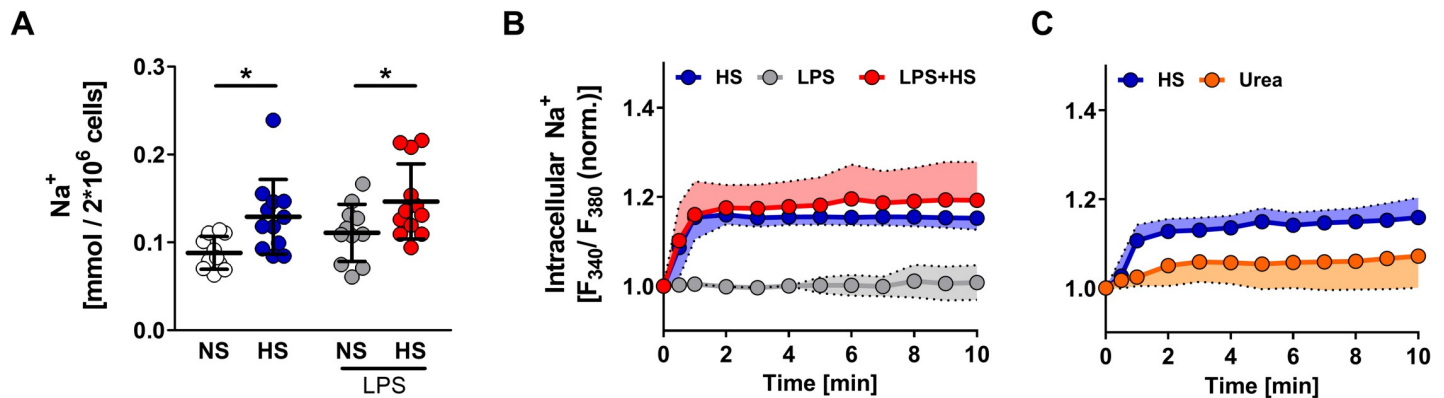

**Fig 1. HS conditions induce rapid Na<sup>+</sup> influx in MΦs.** (A) Total Na<sup>+</sup> content of RAW264.7 MΦs ± 10 ng/ml LPS under NS or HS (NS + 40 mM NaCl) conditions (mean ± SD;  $n = 11-12$ ; Student  $t$  test ± Welch correction; \* $p < 0.05$ ). (B) Relative [Na<sup>+</sup>]<sub>i</sub> of RAW264.7 MΦs. Traces of RAW264.7 MΦs stimulated with HS, LPS, or both at  $t = 10$  s (mean ± SD;  $n = 7-9$ ). (C) Relative [Na<sup>+</sup>]<sub>i</sub> of RAW264.7 MΦs. Traces of RAW264.7 MΦs stimulated with HS or 80 mM urea at  $t = 10$  s (mean ± SD;  $n = 5$ ). For numerical raw data, please see [S1 Data](#). HS, high salt; LPS, lipopolysaccharide; MΦ, monocyte/macrophage-like cell; [Na<sup>+</sup>]<sub>i</sub>, intracellular Na<sup>+</sup> in situ; NS, normal salt.

<https://doi.org/10.1371/journal.pbio.3000722.g001>

production. Because HS alone (in the absence of LPS) does not induce NO production (Fig 2), as described earlier [1,10], we used MΦs stimulated with LPS in the presence of HS for this screening purpose (Fig 2). Conforming to our earlier findings [1,10], HS increased LPS-triggered NO release, whereas the osmolality control urea did not (Fig 2). The various inhibitors (S1 Table) revealed that only exposure to the NCX inhibitors KB-R7943 mesylate (KB-R) [17], SEA 0400 (SEA) [18], and NiCl<sub>2</sub> [19] impaired HS-increased NO production in LPS-stimulated MΦs (Fig 2). Of note, these NCX inhibitors did not trigger NO production in the absence of LPS (S1 Fig).

MΦs are known to express NCX [20], of which NCX1 and NCX3 are expressed in human MΦs [21]. A query of the ImmGen database [16] revealed that NCX1 (*Scl8a1*) is robustly expressed in mouse MΦs, whereas there was minimal expression of *Scl8a2* (the gene coding for NCX2) and *Scl8a3* (NCX3). These findings were confirmed by quantitative real-time PCR (qRT-PCR) analysis of mouse MΦs (Fig 3A). There are several *Scl8a1* splice variants known (reviewed in [22]). To determine the dominantly expressed variant (Fig 3B), we analyzed RNA sequencing (RNA-seq) data of bone marrow-derived MΦs (BMDMs). Transcriptome assembly identified two additional transcript variants (Fig 3B, red). Transcript abundance estimation revealed dominant expression of one novel variant (StringTie Assembly version 1), which skipped an internal exon and featured an additional 5' exon upstream of the open reading frame (ORF), representing an alternative untranslated region (UTR). This novel *Scl8a1* variant has not been annotated in the standard GENCODE version M10 or RefSeq catalog, but it has been independently predicted by the National Center for Biotechnology Information (NCBI) eukaryotic gene prediction tool Gnomon under XM\_006523944 (Fig 3B, blue).

### Increases in extracellular Na<sup>+</sup> stimulate MΦ NCX currents

To explore the functional role of NCX in HS-increased inflammatory MΦ activation, we assessed whole-cell currents (whole-cell voltage clamp) of MΦ as a function of the membrane potential ( $V_m$ ). The HS-sensitive current, determined as the difference between the current in the presence and absence of HS, showed increased inward currents (Fig 4A, left panel), suggesting influx of positively charged ions upon HS exposure. As published earlier [23,24], we found that the LPS-sensitive current, determined as the difference between the current in the presence and absence of LPS, showed outward rectification at positive  $V_m$  (Fig 4A, middle

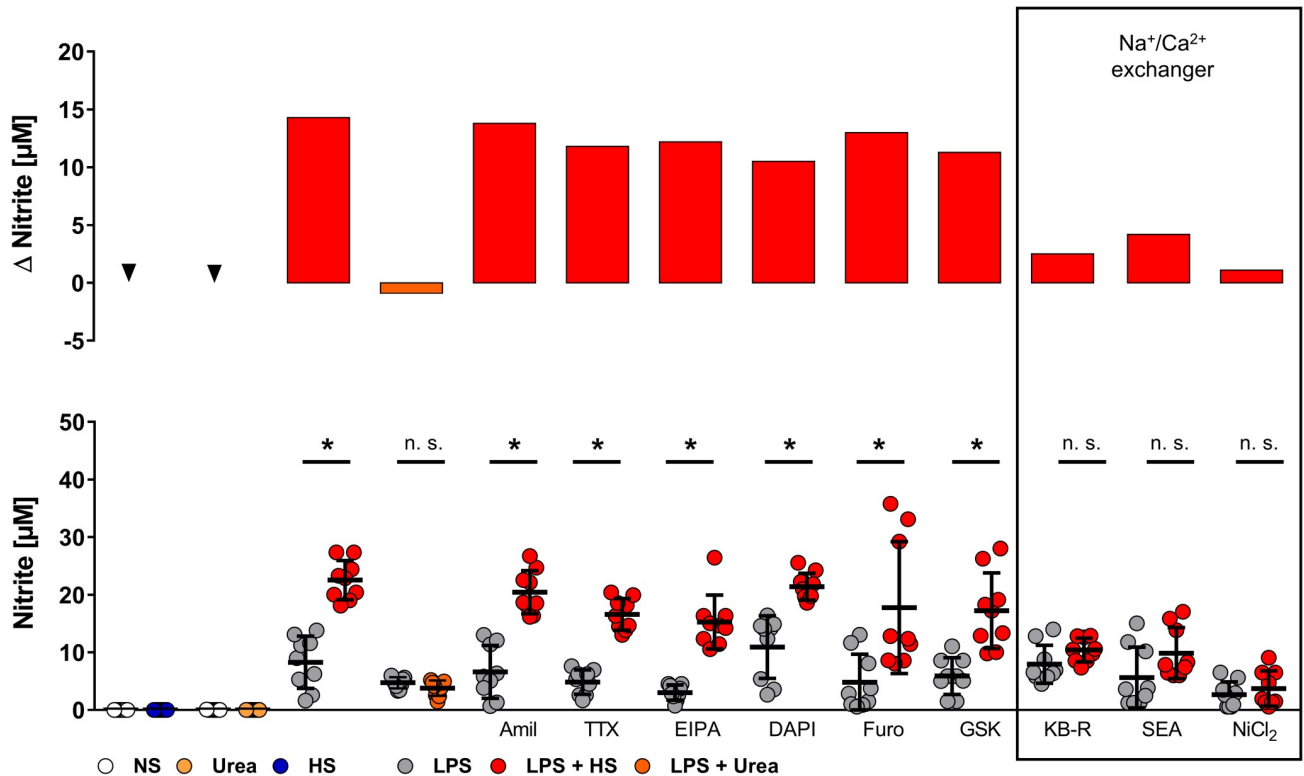

**Fig 2. NCX inhibitors abrogate HS-boosted NO production of LPS-stimulated MΦs.** Lower panel: nitrite levels of RAW264.7 MΦs pretreated with indicated inhibitors and stimulated  $\pm$  LPS  $\pm$  HS or 80 mM urea (mean  $\pm$  SD;  $n = 9$ ; Student  $t$  test or Mann-Whitney test;  $*p < 0.05$ ). Upper panel: changes of means in nitrite production upon indicated stimulation and/or treatment ( $\Delta$  nitrite). For numerical raw data, please see [S1 Data](#). HS, high salt; LPS, lipopolysaccharide; MΦ, monocyte/macrophage-like cell; NCX,  $\text{Na}^+/\text{Ca}^{2+}$  exchanger; NO, nitric oxide; NS, normal salt; n.s., not significant.

<https://doi.org/10.1371/journal.pbio.3000722.g002>

panel). By contrast, exposure of MΦ to LPS in the presence of HS reduced outward currents and increased inward currents (Fig 4A, right panel). Overall, this is consistent with HS triggering the influx of positively charged ions at negative  $V_m$  and reduced net efflux at positive  $V_m$ . In a separate set of experiments, we used  $\text{NiCl}_2$  to block NCX currents rapidly.  $\text{NiCl}_2$  pretreatment abolished HS-triggered inward currents (Fig 4B, left panel). However,  $\text{NiCl}_2$  treatment prior to LPS stimulation did not affect the outward rectification of the LPS-sensitive currents at positive  $V_m$  (Fig 4B, middle panel). Again,  $\text{NiCl}_2$  treatment prior to stimulation with LPS and HS abrogated HS-triggered increased inward currents but did not affect the LPS-sensitive currents at positive  $V_m$  (Fig 4B, right panel).

In order to analyze NCX currents directly, we measured the total current of LPS- and LPS + HS-treated MΦs before and after addition of  $\text{NiCl}_2$ . The Ni-sensitive current, determined as the difference between the current in the absence and presence of  $\text{NiCl}_2$ , was used as a direct measure of NCX current. Compared with LPS alone, at  $V_m$  values negative from the NCX reversal potential ( $E_{\text{rev}}$ ), additional HS exposure enhanced NCX inward current (Fig 4C). Altogether, this suggests that NCX mediates  $\text{Na}^+$  entry. Moreover, HS exposure shifted the  $E_{\text{rev,NCX}}$  from  $-20.9$  mV to  $-7.6$  mV, consistent with the increased electrochemical gradient for  $\text{Na}^+$  ions upon HS (Fig 4D).

Since the forward mode of the NCX exchange activity can only occur at  $V_m$  negative of  $E_{\text{rev}}$  [25], we measured the resting  $V_m$  in untreated and LPS-stimulated MΦs by whole-cell patch clamp technique (current clamp). In line with earlier publications [26–30], we detected a  $V_m$  of  $-18.7$  mV in resting MΦs (Fig 4E), which did not significantly change upon LPS

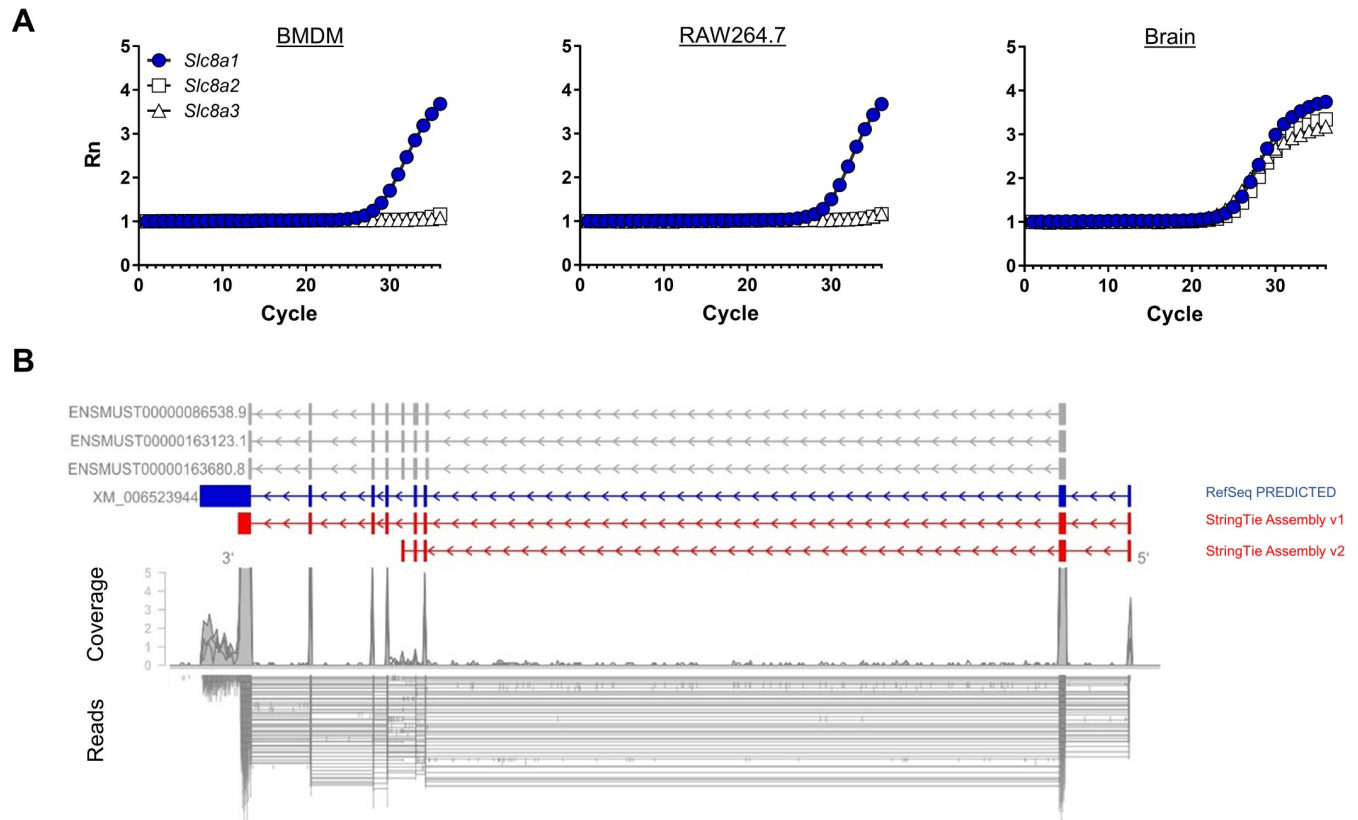

**Fig 3. MΦs express a novel *Slc8a1* splice variant.** (A) A representative real-time amplification plot of *Slc8a1*, *Slc8a2*, and *Slc8a3* in BMDMs, RAW264.7 MΦs, and brain tissue out of two experiments. (B) Shown are the alignments of RNA-seq reads of BMDMs and their coverage with annotated (gray; GENCODE: ENSMUST00000086538.9, ENSMUST00000163123.1, ENSMUST00000163680.8), predicted (blue; RefSeq PREDICTED: XM\_006523944), and StringTie-assembled (red; StringTie Assembly version 1, StringTie Assembly version 2) *Slc8a1* splice variants. For numerical raw data, please see [S1 Data](#). The RNA-seq data can be found in the GEO database (<https://www.ncbi.nlm.nih.gov>) under accession number GSE136662. BMDM, bone marrow-derived MΦ; GEO, Gene Expression Omnibus; MΦ, monocyte/macrophage-like cell; RNA-seq, RNA sequencing; *Slc8*, solute carrier family 8.

<https://doi.org/10.1371/journal.pbio.3000722.g003>

stimulation (S2 Fig). Under NS and LPS conditions, this resting  $V_m$  is very close to the  $E_{rev_{NCX}}$ . This incapacitates NCX-mediated currents to occur in LPS-treated MΦs under NS conditions; however, with HS exposure, it shifts the  $E_{rev}$  into positive directions (Fig 4D), generating the driving force for forward-mode NCX inward currents to occur.

### Increases in extracellular $Na^+$ result in $Ca^{2+}$ loss

In its forward mode, NCX not only allows for  $Na^+$  entry but extrudes  $Ca^{2+}$  in exchange (reviewed in [22,31]). Accordingly, we hypothesized that a rapid efflux of  $Ca^{2+}$  from MΦs may accompany the HS-triggered increase in  $[Na^+]_i$ . Therefore, we analyzed the emitted fluorescence of Fura-2-loaded MΦs as a measure of intracellular  $Ca^{2+}$  in situ ( $[Ca^{2+}]_i$ ) (Fig 5A and 5B). In accordance with previous publications [32–34], there was no long-lasting increase in  $[Ca^{2+}]_i$  upon LPS stimulation under NS in MΦs (Fig 5B). Exposure to HS in the absence or presence of LPS stimulation, however, resulted in a rapid decrease of  $[Ca^{2+}]_i$  (Fig 5A and 5B). We confirmed these results using flow cytometry-based analysis after staining with the  $Ca^{2+}$ -sensitive dyes Fluo-3 and Fura-Red. Again, upon HS exposure in the absence or presence of LPS, we noted a rapid decrease of  $[Ca^{2+}]_i$ , which inversely mirrored the increase of  $[Na^+]_i$  (Fig 5C and 5D). This further supports the notion that a single exchange mechanism may contribute to HS-triggered  $Na^+$  influx and  $Ca^{2+}$  loss in MΦs.

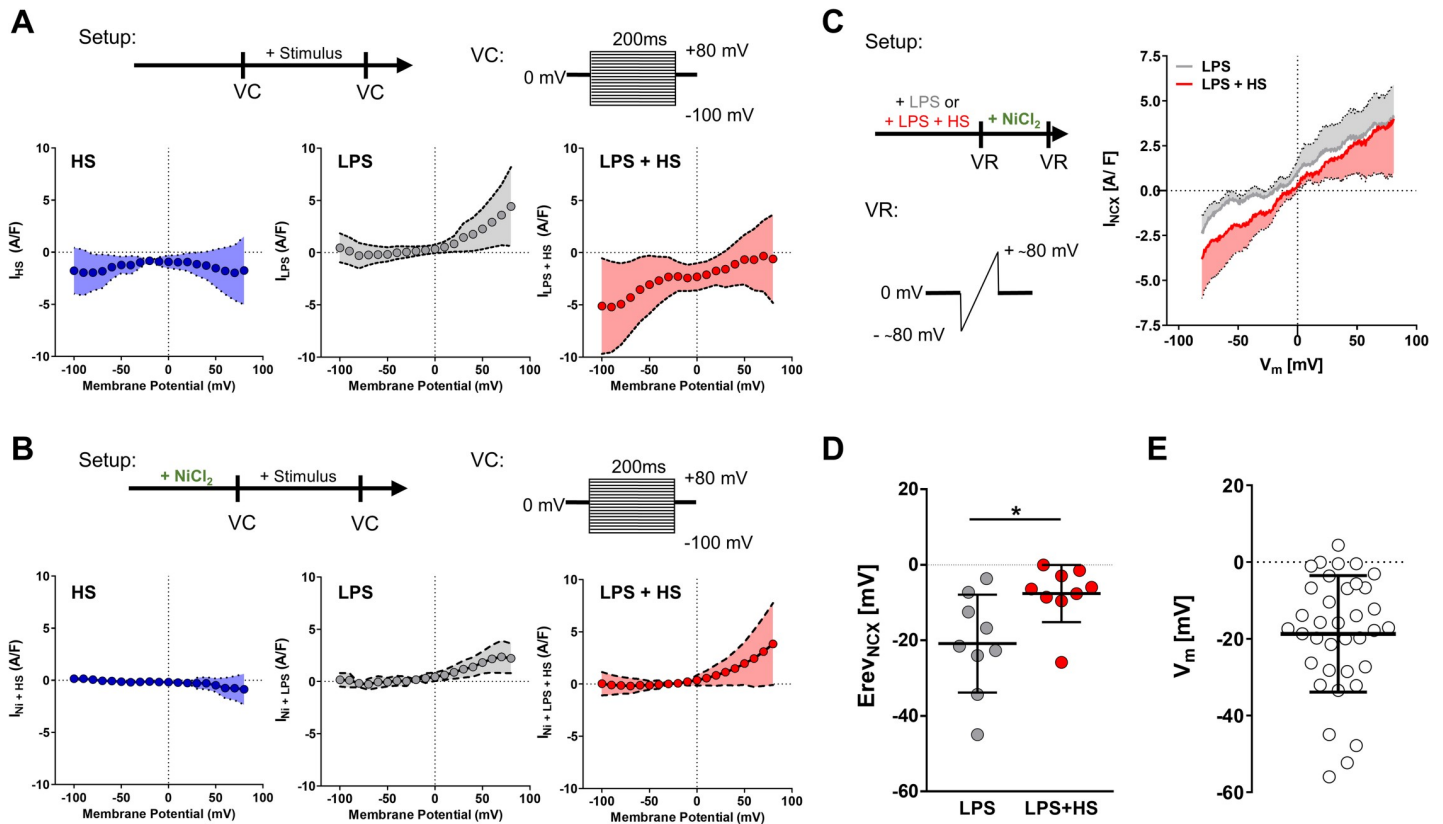

**Fig 4. HS exposure results in NCX-mediated inward currents.** (A) Current/voltage relationships of  $M\Phi \pm LPS \pm HS$ . Whole-cell VC experiments were performed before and after stimulation of BMDMs. Voltage steps were applied, and differential currents ( $I_{HS}$ ,  $I_{LPS}$ ,  $I_{LPS+HS}$ ) were plotted (mean  $\pm$  95% CI;  $n = 10-13$ ). (B) As in (A), but with NiCl<sub>2</sub> pretreatment (means  $\pm$  95% CI;  $n = 10$ ). (C) Current/voltage relationships of BMDMs stimulated with LPS  $\pm$  HS followed by NiCl<sub>2</sub> treatment. Whole-cell VR experiments were performed, and Ni-sensitive (i.e., NCX-sensitive) currents ( $I_{NCX}$ ) were determined (means  $\pm$  95% CI;  $n = 9$ ). (D)  $E_{rev_{NCX}}$  (means  $\pm$  SD;  $n = 9$ ; Mann-Whitney test; \* $p < 0.05$ ). (E) Resting  $V_m$  of BMDMs (means  $\pm$  SD;  $n = 36$ ). For numerical raw data, please see [S1 Data](#). BMDM, bone marrow-derived M $\Phi$ ;  $E_{rev_{NCX}}$ , NCX reversal potential; HS, high salt; I, current; LPS, lipopolysaccharide; M $\Phi$ , monocyte/macrophage-like cell; NCX, Na<sup>+</sup>/Ca<sup>2+</sup> exchanger; VC, voltage clamp;  $V_m$ , membrane potential; VR, voltage ramp.

<https://doi.org/10.1371/journal.pbio.3000722.g004>

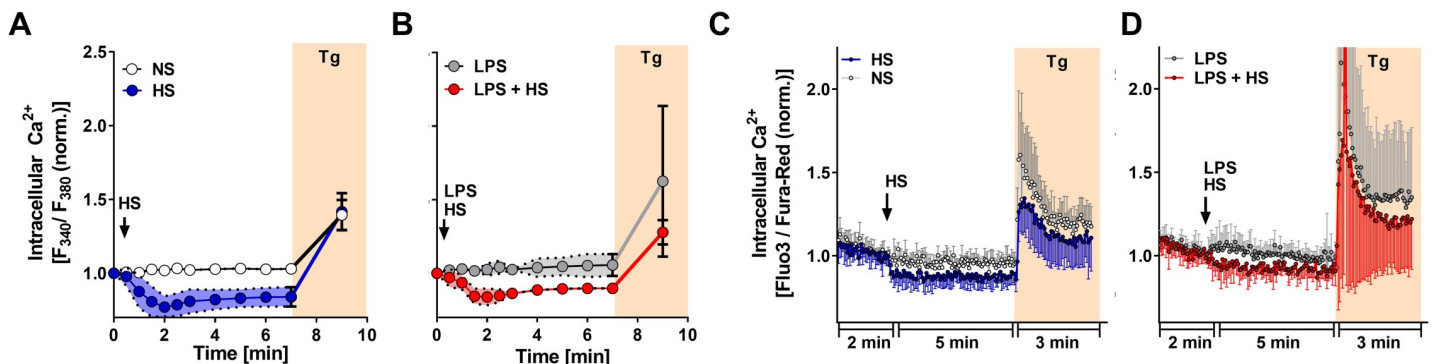

**Fig 5. HS exposure causes Ca<sup>2+</sup> loss.** (A) Relative [Ca<sup>2+</sup>]<sub>i</sub> levels of RAW264.7 M $\Phi$ s. Traces of Fura-2-loaded RAW264.7 M $\Phi$ s stimulated  $\pm$  HS at  $t = 10$  s (mean  $\pm$  SD;  $n = 6$ ). Where indicated, Tg was added (means  $\pm$  SD;  $n = 2$ ). (B) As in (A), but RAW264.7 M $\Phi$ s were stimulated with LPS  $\pm$  HS at  $t = 10$  s (mean  $\pm$  SD;  $n = 5$ ). Where indicated, Tg was added (means  $\pm$  SD;  $n = 2$ ). (C) As in (A), but relative [Ca<sup>2+</sup>]<sub>i</sub> levels were assessed in Fluo-3/Fura-Red-loaded M $\Phi$ s (means  $\pm$  SD;  $n = 6$ ). (D) As in (B), but relative [Ca<sup>2+</sup>]<sub>i</sub> levels were assessed in Fluo-3/Fura-Red-loaded M $\Phi$ s (means  $\pm$  SD;  $n = 8$ ). For numerical raw data, please see [S1 Data](#). [Ca<sup>2+</sup>]<sub>i</sub>, intracellular Ca<sup>2+</sup> in situ; HS, high salt; LPS, lipopolysaccharide; M $\Phi$ , monocyte/macrophage-like cell; Tg, thapsigargin.

<https://doi.org/10.1371/journal.pbio.3000722.g005>

To assess whether HS-dependent decreases in  $[Ca^{2+}]_i$  were mediated by increased uptake into intracellular stores, we exposed MΦs to thapsigargin (Tg, an inhibitor of the endoplasmic reticulum  $Ca^{2+}$ -ATPase; reviewed in [35]) at the end of the experiments. Tg treatment resulted in a transient release of  $Ca^{2+}$  from intracellular stores, leading to an increase in  $[Ca^{2+}]_i$  (Fig 5A, 5B, 5C and 5D). Importantly, HS exposure did not abolish the Tg-dependent  $Ca^{2+}$  release, suggesting that changes in  $Ca^{2+}$  uptake into intracellular stores upon HS exposure are not involved.

### Pharmacological inhibition of NCX interferes with HS-boosted MΦ function

To further corroborate these findings, we used KB-R at a concentration known to inhibit the NCX forward mode (reviewed in [36]) and measured the HS-dependent changes in  $[Na^+]_i$  and  $[Ca^{2+}]_i$  in the absence or presence of LPS. KB-R treatment did not impair MΦ viability (S3 Fig) but blunted HS-triggered  $Na^+$  entry in the absence or presence of LPS (Fig 6A and 6B). This was paralleled by abrogated HS-mediated changes in  $[Ca^{2+}]_i$  (Fig 6C and 6D).

Importantly, KB-R treatment interfered with HS-induced NFAT5 expression in the absence (S4A Fig) or presence of LPS stimulation (Fig 7A). In LPS-treated MΦs, this was paralleled by suppression of HS-boosted expression of the *Nfat5* target gene *Nos2* (Fig 7B), which is in line with the reduced effect of HS on LPS-induced NO production. (Fig 2). We additionally used  $NiCl_2$  and SEA to interfere with NCX activity. Again, these inhibitors did not affect MΦ viability (S3 Fig).  $NiCl_2$  treatment diminished HS-induced NFAT5 in the absence (S4B Fig) or presence of LPS (Fig 7C).  $NiCl_2$  abolished HS-augmented expression of *Nos2* in LPS-stimulated MΦs (Fig 7D). Likewise, SEA interfered with HS-induced NFAT5 levels in the absence (S4C Fig) or presence of LPS (Fig 7E) and subsequently boosted *Nos2* expression (Fig 7F).

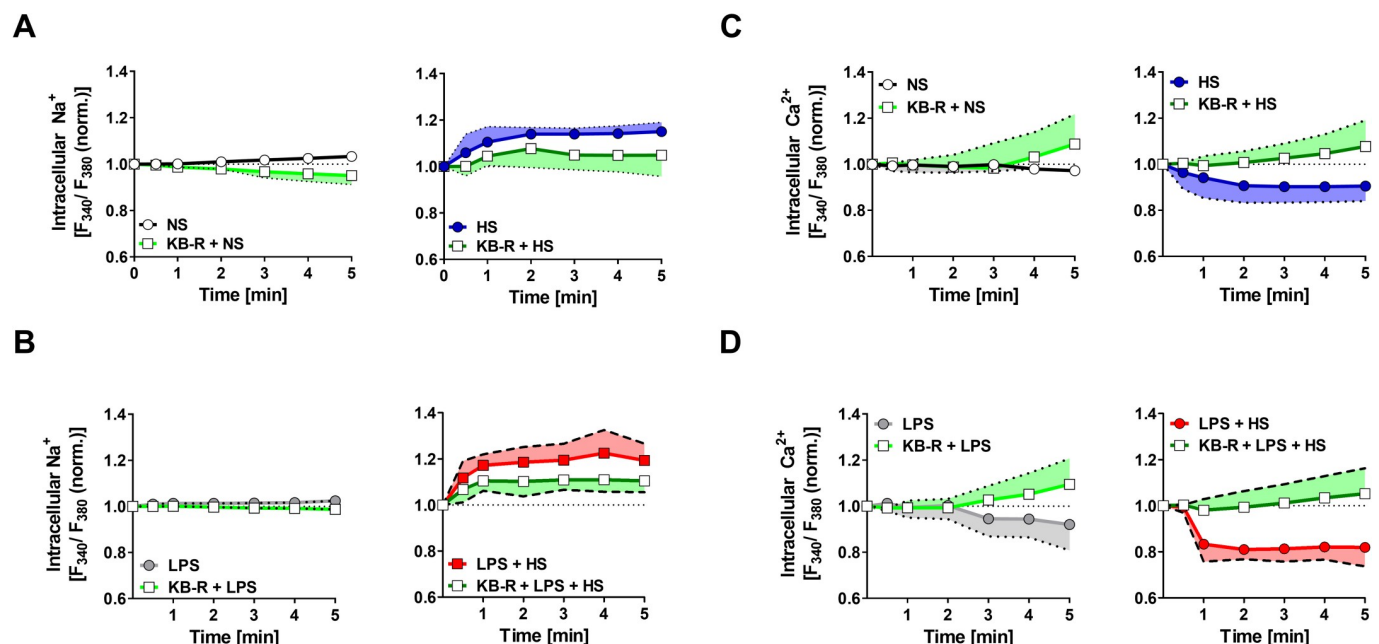

**Fig 6. Pharmacological inhibition of NCX activity blunts HS-triggered  $Na^+$  influx and  $Ca^{2+}$  loss.** (A) Relative  $[Na^+]_i$  levels in RAW264.7 MΦs. Traces of RAW264.7 MΦs stimulated  $\pm$  HS (at  $t = 10$  s)  $\pm$  KB-R pretreatment (means  $\pm$  SD;  $n = 4$ –8). (B) Relative  $[Na^+]_i$  levels in RAW264.7 MΦs. Traces of RAW264.7 MΦs stimulated with LPS  $\pm$  HS (at  $t = 10$  s)  $\pm$  KB-R pretreatment (means  $\pm$  SD;  $n = 5$ –8). (C) As in (A), but relative  $[Ca^{2+}]_i$  levels were assessed in Fura-2-loaded MΦs (means  $\pm$  SD;  $n = 5$ –8). (D) As in (B), but relative  $[Ca^{2+}]_i$  levels were assessed in Fura-2-loaded MΦs (means  $\pm$  SD;  $n = 6$ –8). For numerical raw data, please see S1 Data.  $[Ca^{2+}]_i$ , intracellular  $Ca^{2+}$  in situ; HS, high salt; LPS, lipopolysaccharide; MΦ, monocyte/macrophage-like cell; KB-R, KB-R7943 mesylate;  $[Na^+]_i$ , intracellular  $Na^+$  in situ; NCX,  $Na^+/Ca^{2+}$  exchanger.

<https://doi.org/10.1371/journal.pbio.3000722.g006>

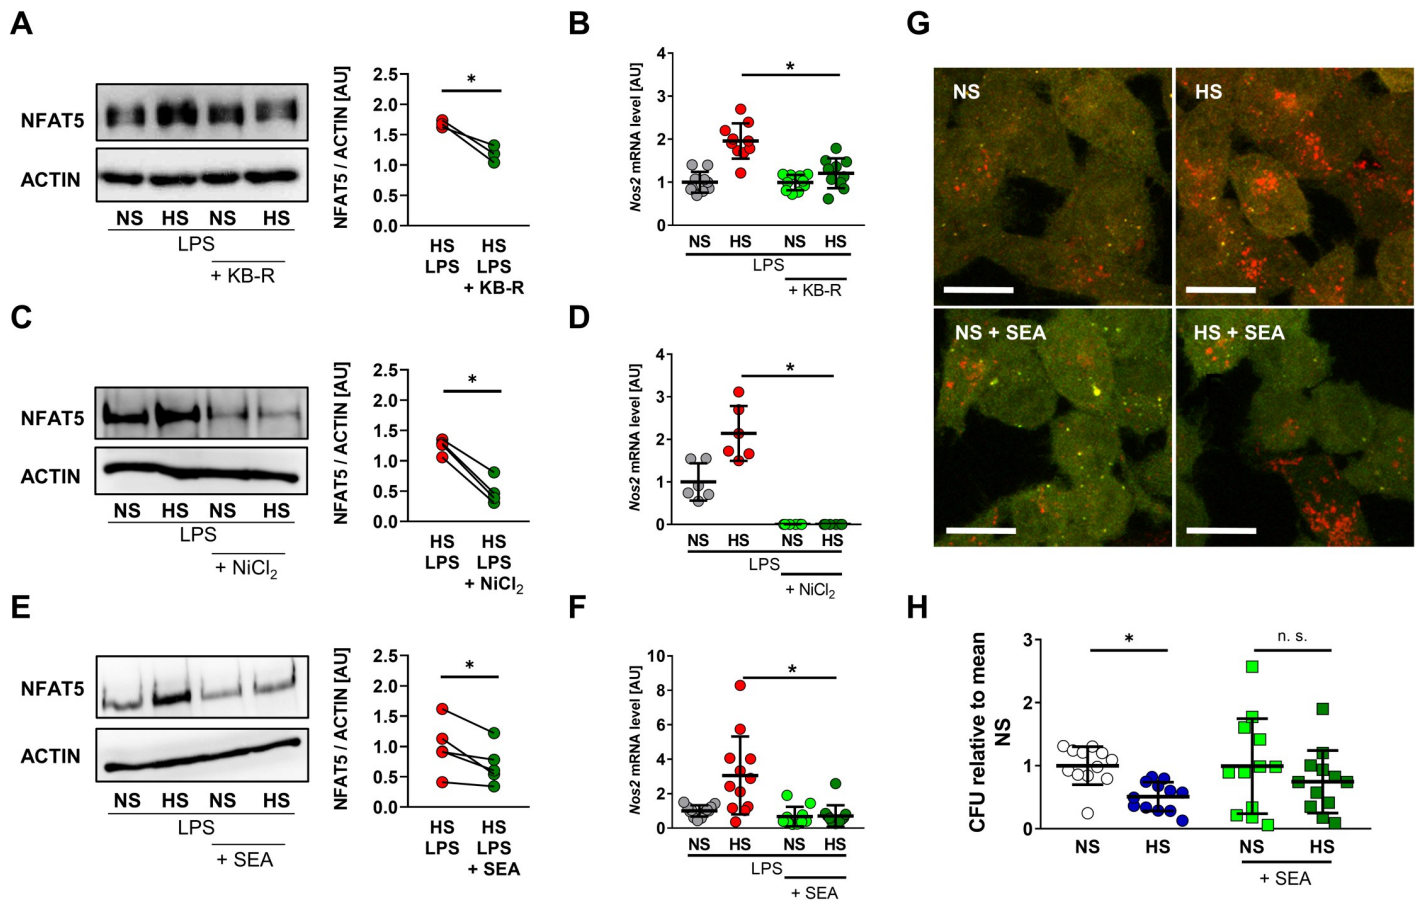

**Fig 7. Pharmacological inhibition of NCX activity blocks HS-boosted MΦ activity.** (A) Immunoblotting and densitometry of NFAT5 6 h after LPS ± HS in RAW264.7 MΦs ± KB-R pretreatment ( $n = 3$ ; paired  $t$  test;  $*p < 0.05$ ). (B) *Nos2* levels in RAW264.7 MΦs 4 h after LPS ± HS ± KB-R pretreatment (means ± SD;  $n = 10$ ; Student  $t$  test;  $*p < 0.05$ ). (C) Immunoblotting and densitometry of NFAT5 in RAW264.7 MΦs 4 h after LPS ± HS ± NiCl<sub>2</sub> pretreatment ( $n = 4$ ; paired  $t$  tests;  $*p < 0.05$ ). (D) *Nos2* levels in RAW264.7 MΦs 4 h after LPS ± HS ± NiCl<sub>2</sub> pretreatment (means ± SD;  $n = 6$ ; Student  $t$  test + Welch correction;  $*p < 0.05$ ). (E) Immunoblotting and densitometry of NFAT5 in RAW264.7 MΦs 4 h after LPS ± HS ± SEA pretreatment ( $n = 5$ ; paired  $t$  test;  $*p < 0.05$ ). (F) *Nos2* in RAW264.7 MΦs 4 h after LPS ± HS ± SEA pretreatment (means ± SD;  $n = 10$ – $12$ ; Mann–Whitney test;  $*p < 0.05$ ). (G) RFP-GFP-mLC3 RAW264.7 MΦs were infected with *Escherichia coli* ± HS ± SEA pretreatment. Representative images 2 h after infection (RFP: red; GFP: green; scale bar: 10 μm). (H) Relative *E. coli* load at 2 h after infection of RAW264.7 MΦs ± HS ± SEA pretreatment (means ± SD;  $n = 12$ ; Student  $t$  tests;  $*p < 0.05$ ). For numerical raw data, please see S1 Data. For raw immunoblots, please see S1 Blots. CFU, colony forming unit; GFP, green fluorescent protein; HS, high salt; KB-R, KB-R7943 mesylate; LPS, lipopolysaccharide; mLC3, microtubule-associated protein 1 light chain 3; MΦ, monocyte/macrophage-like cell; NCX, Na<sup>+</sup>/Ca<sup>2+</sup> exchanger; NFAT5, nuclear factor of activated T cells 5; *Nos2*, nitric oxide synthase 2; NS, normal salt; n.s., not significant; RFP, red fluorescent protein; SEA, SEA 0400.

<https://doi.org/10.1371/journal.pbio.3000722.g007>

In addition to increasing *Nos2* expression, HS-induced *Nfat5* expression facilitates autolysosome formation upon infection, which is critically required for HS-boosted antibacterial activity directed against *E. coli* [10]. To test the impact of NCX inhibition on autolysosome formation, we used SEA in MΦs that express the tandem monomeric red fluorescent protein (RFP)-green fluorescent protein (GFP)-tagged microtubule-associated protein 1 light chain 3 (mLC3). Because GFP fluorescence is pH sensitive, GFP<sup>+</sup>RFP<sup>+</sup> vesicles indicate autophagosomes, whereas GFP<sup>−</sup>RFP<sup>+</sup> vacuoles mark degradative, acidified autolysosomes [37]. In accordance with our previous findings [10], HS exposure boosted the formation of autolysosomes in controls; however, in NCX-inhibited cells, HS failed to increase autolysosome formation, indicating disturbed autophagy (Fig 7G). Building on our earlier findings that HS-boosted antibacterial activity hinges on increased autophagy [10], NCX inhibition incapacitated the effect of HS on antibacterial activity (Fig 7H).



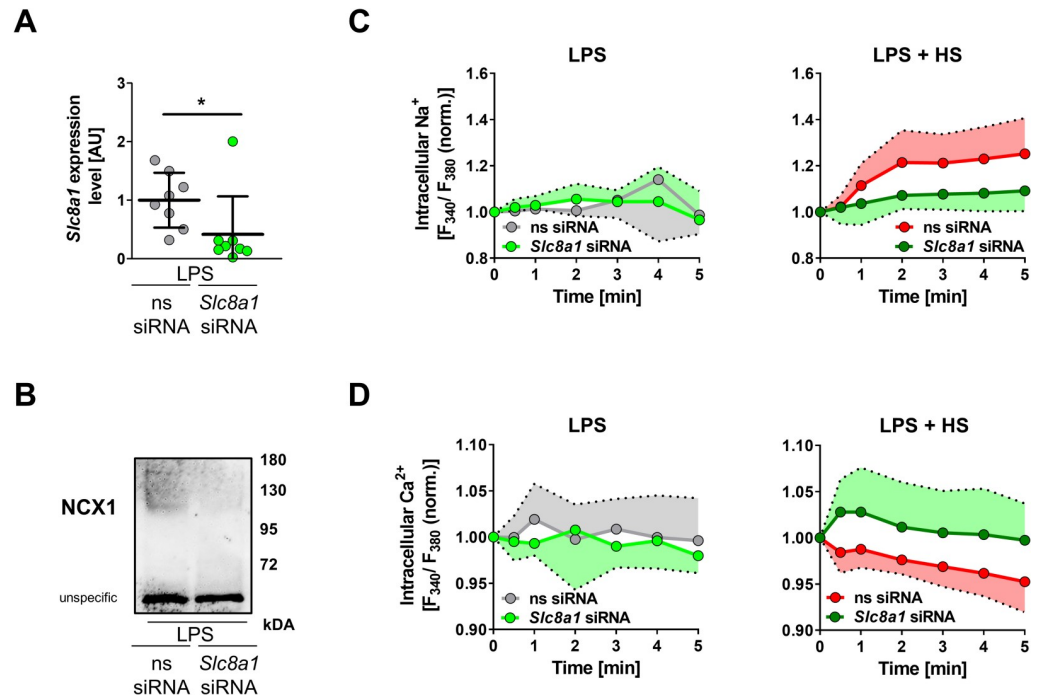

**Fig 8. *Slc8a1* silencing decreases Na<sup>+</sup> influx and Ca<sup>2+</sup> efflux.** (A) *Slc8a1* and (B) membranous NCX1 expression in LPS-stimulated ns or *Slc8a1*-specific siRNA-treated BMDMs after 4 h (means ± SD;  $n = 8$ ; Mann-Whitney test;  $*p < 0.05$ ). (C) Relative [Na<sup>+</sup>]<sub>i</sub> levels of ns siRNA and *Slc8a1* siRNA-treated BMDMs exposed to LPS ± HS at  $t = 10$  s (means ± SD;  $n = 5-7$ ). (D) Relative [Ca<sup>2+</sup>]<sub>i</sub> levels in ns siRNA and *Slc8a1* siRNA-treated BMDMs exposed to LPS ± HS at  $t = 10$  s (means ± SD;  $n = 6-11$ ). For numerical raw data, please see [S1 Data](#). For raw immunoblots, please see [S1 Blots](#). BMDM, bone marrow-derived MΦ; [Ca<sup>2+</sup>]<sub>i</sub>, intracellular Ca<sup>2+</sup> in situ; HS, high salt; LPS, lipopolysaccharide; [Na<sup>+</sup>]<sub>i</sub>, intracellular Na<sup>+</sup> in situ; ns, nonsilencing; NCX, Na<sup>+</sup>/Ca<sup>2+</sup> exchanger; siRNA, small interfering RNA; *Slc8*, solute carrier family 8.

<https://doi.org/10.1371/journal.pbio.3000722.g008>

### Silencing of *Slc8a1* abrogates HS-amplified MΦ function

Next, we used RNA interference (RNAi) to target NCX1 expression in MΦs. Transfer of *Slc8a1*-specific small interfering RNA (siRNA) reduced *Slc8a1* mRNA levels in the absence ([S5 Fig](#)) and presence of LPS ([Fig 8A](#)). This was paralleled by diminished membranous expression of NCX1 ([Fig 8B](#)). Analysis of Ni-sensitive currents in *Slc8a1*-silenced MΦs upon HS exposure revealed that targeting *Slc8a1* diminished Ni-sensitive inward currents ([S6 Fig](#)). Because Ni-sensitive currents represent NCX currents, this suggests that silencing of *Slc8a1* is functional. Conforming to our pharmacological inhibitor data ([Fig 6](#)), silencing of *Slc8a1* strongly reduced HS-triggered increase in [Na<sup>+</sup>]<sub>i</sub> ([Fig 8C](#)). Consistently, in this situation, HS failed to lower [Ca<sup>2+</sup>]<sub>i</sub> ([Fig 8D](#)).

In line with this, *Slc8a1*-specific siRNA largely diminished the effect of Na<sup>+</sup>-induced NFAT5 protein levels in the absence ([S7A Fig](#)) and presence of LPS ([Fig 9A](#)). Silencing of *Slc8a1* under NS conditions did not induce NO production ([S7B Fig](#)). In LPS-activated MΦs, *Slc8a1* silencing abolished HS-triggered increases in *Nos2* mRNA expression ([Fig 9B](#)) and reduced HS-augmented NO production ([Fig 9C](#)). Finally, *Slc8a1* silencing abrogated HS-boosted autolysosome formation ([Fig 9D](#)) and subsequent antimicrobial activity ([Fig 9E](#)).

Overall, the RNAi experiments corroborate our pharmacological inhibition experiments and demonstrate that NCX1-dependent signaling is critical for HS-boosted inflammatory and antimicrobial response ([Fig 10](#)).

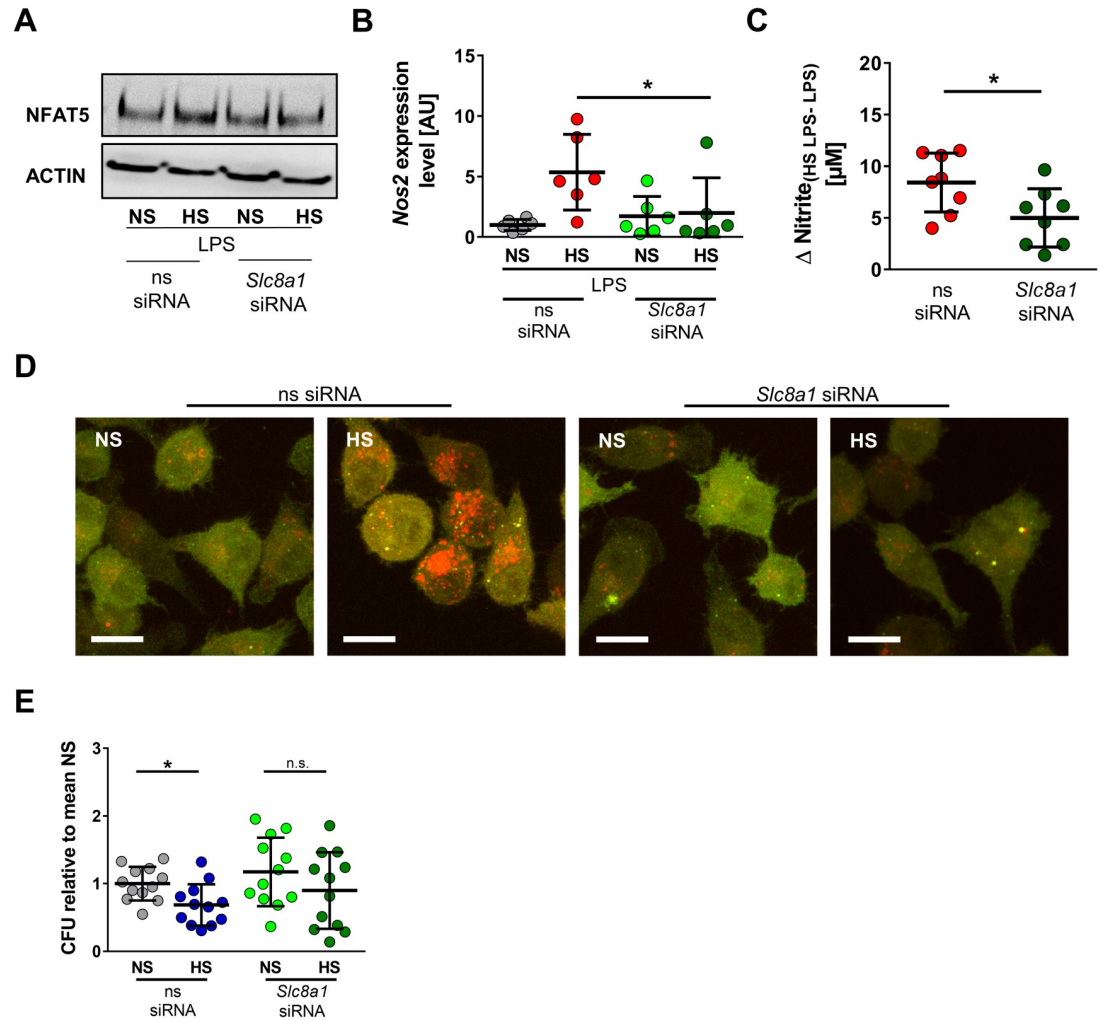

**Fig 9. *Slc8a1* silencing abrogates HS-augmented MΦ activity.** (A) ns siRNA and *Slc8a1* siRNA RAW264.7 were treated with LPS ± HS. Representative NFAT5 and ACTIN immunoblot 4 h after stimulation from two experiments. (B) As in (A), but *Nos2* in BMDMs 4 h after LPS ± HS (means ± SD;  $n = 6$ ; Mann-Whitney test;  $*p < 0.05$ ). (C) As in (B), but  $\Delta$  nitrite<sub>HS LPS-LPS</sub> after 24 h (means ± SD;  $n = 8$ ; Student  $t$  test). (D) ns siRNA and *Slc8a1* siRNA-treated RFP-GFP-mLC3 RAW264.7 MΦs were infected with *E. coli* ± HS. Representative images 2 h after infection from three experiments (RFP: red; GFP: green; scale bar: 10  $\mu$ m). (E) ns siRNA and *Slc8a1* siRNA-treated BMDMs were infected with *E. coli* ± HS. *E. coli* load at 2 h infection (means ± SD;  $n = 12$ ; Student  $t$  tests;  $*p < 0.05$ ). For numerical raw data, please see [S1 Data](#). For raw immunoblots, please see [S1 Blots](#). BMDM, bone marrow-derived MΦ; CFU, colony forming unit; GFP, green fluorescent protein; HS, high salt; LPS, lipopolysaccharide; mLC3, microtubule-associated protein 1 light chain 3; MΦ, monocyte/macrophage-like cell; NFAT5, nuclear factor of activated T cells 5; *Nos2*, nitric oxide synthase 2; NS, normal salt; ns, nonsilencing; n.s., not significant; RFP, red fluorescent protein; siRNA, small interfering RNA; *Slc8*, solute carrier family 8.

<https://doi.org/10.1371/journal.pbio.3000722.g009>

## Discussion

In addition to organic chemical signals, the local ionic inorganic tissue microenvironment is now recognized as a novel regulator of immune cell function (reviewed in [38–40]). We and others have demonstrated earlier that local  $\text{Na}^+$  imbalances are able to influence immune cell activation and to boost MΦ activation. HS amplification of MΦ activation hinges on signal molecules such as p38/mitogen-activated protein kinase, NFAT5, and mitochondrial reactive oxygen species (ROS) production, which play an important role in both adaption to osmotic

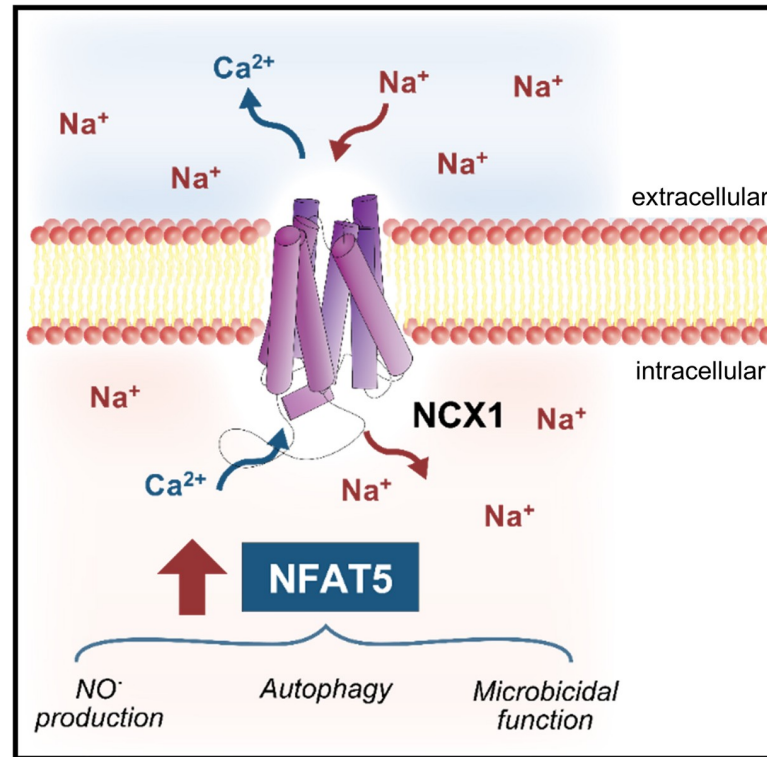

**Fig 10. Graphical summary.** NCX1 is required for  $\text{Na}^+$  entry and  $\text{Ca}^{2+}$  loss upon exposure of MΦs to HS conditions. In LPS-stimulated MΦs, NCX1 is required for HS-boosted NFAT5 accumulation and NO production. Moreover, NCX1 is required for enhanced autolysosome formation and bacterial removal upon HS exposure. HS, high salt; LPS, lipopolysaccharide; MΦ, monocyte/macrophage-like cell; NCX,  $\text{Na}^+/\text{Ca}^{2+}$  exchanger; NFAT5, nuclear factor of activated T cells 5; NO, nitric oxide.

<https://doi.org/10.1371/journal.pbio.3000722.g010>

stress and innate cell activation [12,41–45]. However, upstream LPS-independent mechanisms linking increased external  $\text{Na}^+$  to altered MΦ activation remained unknown.

In the present study, we show that exposure of MΦs to HS resulted in an immediate rapid increase in intracellular  $\text{Na}^+$ . We investigated several  $\text{Na}^+$  entry pathways on their impact on HS-dependent MΦ stimulation. In line with earlier findings [15], we did not detect a contribution of voltage-gated  $\text{Na}^+$  channels. Moreover, our data demonstrate that amiloride-sensitive  $\text{Na}^+$  channels are not involved in HS-boosted MΦs. The latter have been implicated in microglia/MΦ function (reviewed in [46]) and  $\text{Na}^+$  sensing of dendritic cells [47]. In contrast, we show here that in MΦs, NCX1 contributes to  $\text{Na}^+$  entry and subsequent signaling that ultimately results in increased MΦ antimicrobial function upon HS exposure.

The increase of external  $\text{Na}^+$  from 140 mM to approximately 180 mM appears to result in a relatively small increase in the electrochemical gradient for  $\text{Na}^+$  across the membrane. Our data suggest that the plasma membrane of MΦs displays a high permeability for  $\text{Na}^+$  ions. Because the  $E_{\text{rev,NCX}}$  of LPS-treated MΦs matched the  $V_m$  of resting and LPS-stimulated MΦs, NCX currents are incapacitated under NS conditions. By contrast, the small increase in the electrochemical  $\text{Na}^+$  gradient upon HS treatment shifts the  $E_{\text{rev,NCX}}$  approximately 10 mV in the positive direction. Altogether, this facilitates the forward-mode activity of NCX, ultimately allowing  $\text{Na}^+$  cellular entry in exchange for  $\text{Ca}^{2+}$  efflux. Concordantly, we found a decrease in intracellular  $\text{Ca}^{2+}$ . Considering the reported stoichiometric ratio of 3:1 for  $\text{Na}^+/\text{Ca}^{2+}$  exchange (reviewed in [22]), a net movement of positive charges into the cell should rapidly depolarize

the  $V_m$  of MΦs. Increases in intracellular  $\text{Na}^+$  and decreases in intracellular  $\text{Ca}^{2+}$  would rapidly reduce the driving force for NCX and incapacitate NCX currents again.

In accordance with others [32–34], we did not detect any long-lasting increases of  $[\text{Ca}^{2+}]_i$  in MΦs exposed to LPS under NS, indicating that MΦs do not require such increases for their proinflammatory activity. This is in stark contrast to other cells, such as T cells (reviewed in [48]). Westphalen and colleagues reported that  $\text{Ca}^{2+}$  entry in alveolar MΦs through connexin 43-dependent interconnections from alveolar epithelial cells suppresses the inflammatory capacity of these MΦs [49]. Moreover, increases in intracellular  $\text{Ca}^{2+}$  can trigger adenosine monophosphate-activated protein kinase activity, which is able to curtail inflammatory properties of mononuclear myeloid cells [50]. This indicates that high  $\text{Ca}^{2+}$  levels can exert anti-inflammatory MΦ activity, implying that, conversely, lowering  $\text{Ca}^{2+}$  might lead to increased proinflammatory activity. Following this reasoning, we show that lowering  $[\text{Ca}^{2+}]_i$  via NCX1 is linked to HS-boosted proinflammatory activation and antimicrobial MΦ function.

Moreover, low intracellular  $\text{Ca}^{2+}$  levels can induce autophagy (reviewed in [51]) where autophagy is regulated by numerous ion channels, exchangers, and transporters (reviewed in [52]). Previously, we found that the activation of autophagy represents an important auxiliary mechanism to boost antibacterial defense under HS conditions [10]. Here, we demonstrate that NCX1 plays an important role in this HS-boosted autophagy. Building on our earlier publication [10], our finding that interfering with NCX1 abolishes HS-increased autolysosomal formation provides a link between antibacterial responses and NCX1-dependent ion sensing. Our data show that extracellular  $\text{Na}^+$  is able to impact on intracellular organelle formation via NCX1. Very recently, it turned out that subcellular distribution of  $\text{Na}^+$  via two-pore channels plays an important role in controlling the volume of macropinosomes and, thereby, the cell size of MΦs [53]. Determining how increases in extracellular  $\text{Na}^+$  influence these subcellular processes requires further studies.

It is tempting to speculate that sensing of the ionic microenvironment represents a very ancient mechanism that allows animals to sense barrier dysfunction and consequently amplify antimicrobial and inflammatory MΦ responses. Here, we show that  $\text{Na}^+$  sensing by NCX1 represents an ionic mechanism important for MΦs to sense danger (Fig 10). The identification of this molecule opens new avenues to fine-tune MΦ immunobiology.

## Material and methods

### Ethics statement

Animal care and use followed the regulations of the German Animal Welfare Act. Mice were housed at Zentrale Tierlaboratorien (ZTL) der Universität Regensburg and kept under conditions approved by Umweltamt der Stadt Regensburg.

### Reagents and antibodies

The stimulations were performed with LPS from Sigma-Aldrich (*E. coli* O111:B4; #2630) and NaCl from Merck (#1.06400.1000). The channel inhibitors were purchased from Tocris (KB-R7943 mesylate [#12144] [17], SEA0400 [#6164] [18], amiloride [#0890] [54], EIPA [#3378] [55], and GSK 2193874 [#5106] [56]), Biotrend (tetrodotoxin [#BN0518] [57] and furosemide [(#BG0201] [58]), Sigma-Aldrich (DAPI [#D8417-5MG] [59]), and AppliChem ( $\text{NiCl}_2$  [#A2199,1000] [19]). For western blotting, we used rabbit anti-NCX1 antibodies from Abcam (#ab151608), rabbit anti-NFAT5 antibodies from Thermo Fisher Scientific (#PA1-023), and rabbit anti-ACTIN antibodies from Sigma-Aldrich (#A2066). Swine anti-rabbit HRP (Dako; #p0399) was used as secondary antibody.

## MΦ generation

We euthanized the mice before getting the marrow. BMDMs were generated in Teflon bags or Petri dishes supplemented with supernatant of L929 cells, as described earlier [60].

## RNAi in MΦ

Prior to the experiments, we confirmed that commercially available siRNA binds to the predicted *Slc8a1* transcript XM\_006523944 using BLAST. We performed RNAi using *Slc8a1* siRNA (Dharmacon; # L-044925-00-0005) as described earlier [61]. After electroporation, cells were incubated for 1 d before further treatment and analysis.

## MΦ stimulation and infection experiments

MΦs were stimulated with LPS, resulting in a final concentration of 10 ng/ml LPS. NaCl (40 mM) or urea (80 mM) was added to MΦs where indicated. Both an increase of 40 mM in NaCl or adding of 80 mM urea increase osmolality by 80 mOsm/kg [1]. MΦ infection experiments were performed as described previously [1,10]. In brief, BMDMs or RAW264.7 MΦs were infected with *E. coli* HB101 (multiplicity of infection [MOI] of 100) for 1 h ± HS or SEA0400 (25 μM). MΦs were washed two times with PBS in order to remove remaining extracellular bacteria. Gentamicin (100 μg/ml) was added to the NS and HS conditions for an additional 1 h. Subsequently, cells were lysed with 0.1% Triton/0.05% Tween-20 in PBS. Bacterial solutions were serially diluted and plated on Müller–Hinton agar plates. The next day, colony forming units (CFUs) were manually counted and normalized to the mean of the untreated NS group.

## Measurement of intracellular Na<sup>+</sup> by atomic absorption spectrometry

In all,  $2 \times 10^6$  RAW264.7 MΦs were stimulated with LPS ± HS for 10 min. Subsequently, cells were harvested and washed with iso-osmolal urea buffer. The MΦ pellet was lysed in 100 μl H<sub>2</sub>O<sub>ad</sub> containing 0.1% Triton X, and the Na<sup>+</sup> content was determined by atomic absorption spectrometry (Perkin Elmer, model 3100).

## Intracellular ion determination via epifluorescence microscopy

MΦs were seeded on FluoroDish plates. For Na<sup>+</sup> and Ca<sup>2+</sup> measurements, cells were stained as indicated with SBFI (Thermo Fisher Scientific; #S1264) or Fura-2 (Thermo Fisher Scientific; #F1221) in Tyrode solution (140 mM NaCl, 4 mM KCl, 1 mM MgCl<sub>2</sub>, 5 mM HEPES, 1 mM CaCl<sub>2</sub>, 10 mM glucose) containing 0.04% Pluronic (Sigma; #P2443). Cells were subjected to ratiometric quantification of the respective fluophor via live cell imaging for 5–10 min (epifluorescence microscope Motic model 410E). After 10 sec, 40 mM NaCl ± LPS was added to the dish, or cells were left untreated. Fluorescence emissions were recorded, analyzed using IonWizard (IonOptix Cooperation) as described earlier [62], and normalized to the start value.

## Intracellular Ca<sup>2+</sup> measurements using flow cytometry

RAW264.7 MΦs were stained with the Ca<sup>2+</sup>-sensitive dyes Fluo-3 (Thermo Fisher Scientific; #F-1241) and Fura-Red (Thermo Fisher Scientific; #F-3021) [63] for 20 min at room temperature in Tyrode solution containing Pluronic. Subsequently, cells were washed and transferred into FACS tubes. Mean fluorescence intensities of Fluo-3 and Fura-Red were recorded over time using flow cytometry (FACSCanto II). After a lead-in phase of 2 min, HS ± LPS was added, or cells were left untreated. Samples were measured for an additional 5 min. Finally, Tg (Tocris; #1138) was added, and measurements were continued for 3 min. Recordings were

analyzed via the “kinetics” tool of FlowJo (version 10). Fluo-3/Fura-Red ratios were calculated and normalized to the mean of the last three recordings before stimulation.

### Whole-cell patch clamp experiments

For electrophysiological measurements, BMDMs were used, and medium was replaced by an extracellular bathing solution (EC) containing 140 mM NaCl, 5 mM KCl, 2 mM CaCl<sub>2</sub>, 1 mM MgCl<sub>2</sub>, 10 mM HEPES, and 10 mM glucose (pH 7.35) and kept at room temperature. The dishes were placed on the stage of an inverted microscope. Patch pipettes were pulled from filamented borosilicate glass capillaries showing resistances of 2–4.5 MΩ when filled with intracellular pipette solution (IC) containing 140 mM K-gluconate, 5 mM NaCl, 2 mM MgCl<sub>2</sub>, 1 mM CaCl<sub>2</sub>, 11 mM EGTA, 10 mM HEPES, 2 mM Mg-ATP, and 0.3 mM Na-GTP (pH 7.35). The whole-cell configuration of the patch clamp technique [64] was used to record membrane currents and potential in voltage-clamp or current-clamp mode. Signals were recorded and digitized with an Axopatch 200B amplifier (Axon Instruments, Union City, CA) with a Digi-data 1200 converter (Axon Instruments) or an EPC10 amplifier (HEKA Elektronik, Lam-brecht/Pfalz, Germany). Analysis was performed using the software pCLAMP 10.2 (Axon Instruments) or PATCHMASTER 2x90 (HEKA).

Voltage steps were applied from a holding potential (−80 mV or −20 mV) from −100 mV to +80 mV in 10-mV increments and held for 200 ms. The voltage step protocol was performed 2 min after attaining the whole-cell configuration; afterward, cells were stimulated with 40 mM NaCl, 10 ng/ml LPS, or 5 mM NiCl<sub>2</sub>. At 3 min after stimulation, another voltage-clamp protocol was performed.

In a subset of experiments, a voltage ramp protocol from approximately −80 mV to approximately +80 mV (holding potential −20 mV, duration 4 sec, 40 mV/sec) was applied. Measured currents were normalized to the membrane capacitance. For  $V_m$  recordings, the cells were measured over 4 min in current-clamp-zero mode. After 50 sec, cells were stimulated. The first and last 50 sec of this recording were averaged to yield the  $V_m$  before and after stimulation.

For voltages between −40 mV and 30 mV, we fitted a straight line through the Ni-sensitive current data of LPS- and LPS + HS-treated MΦs using the nonlinear regression tool provided by GraphPad PRISM (version 6.0). We used the YIntercept and slope to determine  $E_{rev_{NCX}}$ .

### Autophagy characterization

We seeded RFP-GFP-mLC3 RAW264.7 MΦs (obtained from Invivogen; rawdf-mlc3) on coverslips and infected them with MOI 100 of *E. coli* HB101 ± HS ± 30 min preincubation with SEA0400. At 1 h after infection, cells were washed twice with PBS and incubated in NS or HS media containing 100 μg/ml gentamicin. At 2 h after infection, cells were washed, fixed in 4% paraformaldehyde for 20 min at room temperature, and mounted with ProLong Gold (containing DAPI). A Leica TCS SP5 confocal laser microscope was used for imaging. Images were processed using the Leica Application Suite (version 2.7.3.9723) and Microsoft PowerPoint.

### Bioinformatic analysis of *Slc8a1* isoform expression

RNA of three murine BMDM samples differentiated in vitro for 8 d using M-CSF were isolated with Trizol and the miRNeasy micro kit (Qiagen) according to the manufacturer’s protocol. The quality of the RNA was assessed by visualization of 28S and 18S band integrity on a Tapes-tation 2200 (Agilent). In all, 100 ng of RNA was converted into cDNA libraries using the Tru-Seq RNA library preparation kit version 2. Size distribution of cDNA libraries was measured using the Agilent High Sensitivity DNA assay on a TapeStation 2200 (Agilent). cDNA libraries

were quantified using KAPA Library Quantification Kits (Kapa Biosystems). After cluster generation on a cBot, 75-bp single-read sequencing was performed on a HiSeq1500.

For alignment and genome-guided transcriptome assembly, we followed the “new tuxedo” protocol [65]. After base calling and demultiplexing using CASAVA version 1.8.2, the 75-bp single-end reads were aligned to the mouse reference genome mm10 using HISAT2 version 2.0.6 with option `-dta` and sorted and indexed using Samtools version 0.1.19. Subsequently, transcriptome assembly was performed using StringTie version 1.3.2d, with default parameters for each of the three samples guided by GENCODE vM10 transcriptome annotation. Merging the individual assemblies using the StringTie-merge option produced two novel multiexon transcript variants for *Slc8a1*, labeled StringTie Assembly version 1 and version 2 (Fig 3B). Transcript abundances were estimated by rerunning StringTie with options `-B -e` and analyzed using the R package Ballgown [66]. The RNA-seq data were uploaded in the Gene Expression Omnibus (GEO) database (<https://www.ncbi.nlm.nih.gov>) under accession number GSE136662.

### Quantification of nitrite and lactate dehydrogenase activity

Griess assays were used to quantify nitrite levels in the supernatants as described earlier [1,10]. The cell cytotoxicity kit (Roche; #11644793001) was used to measure lactate dehydrogenase (LDH) activities in supernatants and cell pellets. To assess the relative LDH release, the supernatant-to-pellet ratio of LDH activity was calculated.

### Immunoblotting

For analysis of NFAT5 and ACTIN, MΦs were lysed in 8 M urea containing a protease inhibitor cocktail (Roche; #11836170001), and immunoblotting was performed as described earlier [1,10]. For analysis of NCX1, membranes of MΦs were isolated using the Mem-PER Plus Kit (Thermo Fisher Scientific; #89842Y) according to the manufacturer’s instructions, and immunoblotting for NCX1 was performed. Images were acquired on an Intas Chemostar chemoluminescence imager and processed using Adobe Photoshop CS6 and Microsoft PowerPoint. We used ImageJ (version 1.50b; Rasband, W. S., ImageJ, United States National Institutes of Health, <https://imagej.nih.gov/ij/>) for densitometry of western blots.

### RNA isolation, reverse transcriptions, real-time PCR, and relative quantification

RNA isolation and qRT-PCR of cDNA was performed as described previously [10]. We obtained the following probes from Thermo Fisher Scientific for the analyses: *Slc8a1* (Mm01232254\_m1), *Slc8a2* (Mm00455836\_m1), *Slc8a3* (Mm01309304\_m1), *Nos2* (Mm00440485\_m1), and *Hprt* (Mm00446968\_m1). Relative expression levels were determined using the  $\Delta\Delta C_T$  method. *Hprt* served as endogenous control.

### Statistical analysis

All graphs were generated using GraphPad PRISM (version 6.0). Data sets were assessed for normality distribution via Kolomogorov–Smirnov tests. Normally distributed data were compared by unpaired, two-tailed Student *t* test (for two groups). We compared non-normally distributed data sets using Mann–Whitney tests (for two groups). In case of paired experiments (densitometry), we analyzed the data using paired Student *t* tests. Unless indicated otherwise, all data are depicted as means  $\pm$  SD or 95% CI. We considered *p*-values  $< 0.05$  as statistically significant.

## Supporting information

**S1 Table. Inhibitor data.** List of used inhibitors and concentrations.

(DOCX)

**S1 Fig. Effects of NCX inhibitors on NO production.** NO production was quantified 24 h after incubation of RAW264.7 MΦs ± HS ± after pretreatment with indicated inhibitor. (A) Inhibitor KB-R ( $n = 9$ ). (B) Inhibitor NiCl<sub>2</sub> ( $n = 6$ ). (C) Inhibitor SEA ( $n = 6$ ). For numerical raw data, please see [S1 Data](#). HS, high salt; MΦ, monocyte/macrophage-like cell; KB-R, KB-R7943 mesylate; NCX, Na<sup>+</sup>/Ca<sup>2+</sup> exchanger; NO, nitric oxide; SEA, SEA 0400. (TIF)

**S2 Fig. Current clamp measurements of MΦ upon LPS stimulation.** V<sub>m</sub> of BMDMs before and after addition of 10 ng/ml LPS ( $n = 8$ ; paired  $t$  test;  $*p < 0.05$ ). For numerical raw data, please see [S1 Data](#). BMDM, bone marrow-derived MΦ; LPS, lipopolysaccharide; MΦ, monocyte/macrophage-like cell; V<sub>m</sub>, membrane potential. (TIF)

**S3 Fig. Effects on selected NCX inhibitors on MΦ viability.** RAW264.7 MΦs were pretreated with indicated NCX inhibitors. At 4 h after stimulation ± LPS ± HS relative LDH release normalized to total cellular LDH content was assessed. Exposure of cells to 0.1% Triton X was used as positive control for cytotoxicity (means ± SD;  $n = 9$ ). For numerical raw data, please see [S1 Data](#). HS, high salt; LPS, lipopolysaccharide; MΦ, monocyte/macrophage-like cell; NCX, Na<sup>+</sup>/Ca<sup>2+</sup> exchanger. (TIF)

**S4 Fig. Effects of NCX inhibitors on NFAT5 accumulation.** (A) NFAT5 levels 6 h after incubation of RAW264.7 MΦs ± HS ± KB-R pretreatment. Immunoblotting and densitometry ( $n = 4$ ; paired  $t$  tests;  $*p < 0.05$ ). (B) NFAT5 levels 4 h after incubation of RAW264.7 MΦs ± HS ± NiCl<sub>2</sub> pretreatment. Immunoblotting and densitometry ( $n = 4$ ; paired  $t$  tests;  $*p < 0.05$ ). (C) As in (B), but SEA was used to inhibit NCX ( $n = 7$ ; paired  $t$  tests;  $*p < 0.05$ ). For numerical raw data, please see [S1 Data](#). For raw immunoblots, please see [S1 Blots](#). HS, high salt; KB-R, KB-R7943 mesylate; MΦ, monocyte/macrophage-like cell; NCX, Na<sup>+</sup>/Ca<sup>2+</sup> exchanger; NFAT5, nuclear factor of activated T cells 5; SEA, SEA 0400. (TIF)

**S5 Fig. *Slc8a1* silencing reduces *Slc8a1* mRNA levels.** *Slc8a1* expression in ns or *Slc8a1*-specific siRNA-treated BMDMs (means ± SD;  $n = 8$ ; Student  $t$  test;  $*p < 0.05$ ). For numerical raw data, please see [S1 Data](#). BMDM, bone marrow-derived MΦ; ns, nonsilencing; siRNA, small interfering RNA; *Slc8*, solute carrier family 8. (TIF)

**S6 Fig. *Slc8a1* silencing diminishes inward currents upon HS treatment.** Current/voltage relationships of BMDMs treated with ns siRNA and *Slc8a1* siRNA. These MΦ were stimulated with HS followed by NiCl<sub>2</sub> treatment. Whole-cell VR experiments were performed, and Ni-sensitive (i.e., NCX-sensitive) currents were determined (means ± 95% CI;  $n = 9–10$ ). For numerical raw data, please see [S1 Data](#). BMDM, bone marrow-derived MΦ; HS, high salt; MΦ, monocyte/macrophage-like cell; NCX, Na<sup>+</sup>/Ca<sup>2+</sup> exchanger; ns, nonsilencing; siRNA, small interfering RNA; *Slc8*, solute carrier family 8; VR, voltage ramp. (TIF)

**S7 Fig. *Slc8a1* silencing reduces HS-augmented NFAT5 accumulation.** (A) NFAT5 expression 4 h after LPS ± HS in ns siRNA and *Slc8a1* siRNA-treated RAW264.7 MΦs.



Representative NFAT5 and ACTIN immunoblot out of two similar experiments. (B) As in (A), but HS-triggered  $\Delta$  nitrite after 24 h ( $n = 3$ ). For numerical raw data, please see [S1 Data](#). For raw immunoblots, please see [S1 Blots](#). HS, high salt; LPS, lipopolysaccharide; M $\Phi$ , monocyte/macrophage-like cell; NFAT5, nuclear factor of activated T cells 5; ns, nonsilencing; siRNA, small interfering RNA; *Slc8*, solute carrier family 8.

(TIF)

**S1 Data. Numerical raw data.** All numerical raw data are combined in a single Excel file “S1\_Data.xlsx”. This file consists of several spreadsheets. Each spreadsheet contains the raw data of one subfigure.

(XLSX)

**S1 Blots. Raw images.** The file “S1\_Blots.pdf” covers all uncropped western blot images, including size standards and descriptions.

(PDF)

## Acknowledgments

We are grateful to Monika Nowotny, Christine Lindner, Barbara Bodendorfer, and Dr. Roland Lang for help in generating macrophages.

## Author Contributions

**Conceptualization:** Patrick Neubert, Arne Homann, David Wendelborn, Agnes Schröder, Valentin Schatz, Roland Veelken, Christian Kurts, Karl Kunzelmann, Karin Hammer, Katrina J. Binger, Jens Titze, Dominik N. Müller, Waldemar Kolanus, Joachim L. Schultze, Stefan Wagner, Jonathan Jantsch.

**Data curation:** Patrick Neubert, Arne Homann, David Wendelborn, Anna-Lorena Bär, Agnes Schröder, Peter Linz, Jonas Schulte-Schrepping, Joachim L. Schultze, Stefan Wagner.

**Formal analysis:** Patrick Neubert, Maximilian Trum, Peter Linz, Jonas Schulte-Schrepping, Stefan Wagner, Jonathan Jantsch.

**Funding acquisition:** Dominik N. Müller, Jonathan Jantsch.

**Investigation:** Patrick Neubert, Arne Homann, David Wendelborn, Anna-Lorena Bär, Luka Krampert, Maximilian Trum, Agnes Schröder, Stefan Ebner, Andrea Weichselbaum, Valentin Schatz, Peter Linz, Jonas Schulte-Schrepping, Anna C. Aschenbrenner, Thomas Quast, Sabrina Geisberger, Stefan Wagner, Jonathan Jantsch.

**Methodology:** Patrick Neubert, Arne Homann, David Wendelborn, Anna-Lorena Bär, Luka Krampert, Maximilian Trum, Agnes Schröder, Stefan Ebner, Andrea Weichselbaum, Valentin Schatz, Peter Linz, Roland Veelken, Jonas Schulte-Schrepping, Anna C. Aschenbrenner, Thomas Quast, Christian Kurts, Sabrina Geisberger, Karl Kunzelmann, Karin Hammer, Jens Titze, Waldemar Kolanus, Joachim L. Schultze, Stefan Wagner, Jonathan Jantsch.

**Project administration:** Patrick Neubert, Jonathan Jantsch.

**Resources:** Patrick Neubert, Peter Linz, Roland Veelken, Thomas Quast, Karin Hammer, Jens Titze, Waldemar Kolanus, Joachim L. Schultze, Stefan Wagner, Jonathan Jantsch.

**Supervision:** Patrick Neubert, Valentin Schatz, Peter Linz, Roland Veelken, Karin Hammer, Katrina J. Binger, Dominik N. Müller, Waldemar Kolanus, Stefan Wagner, Jonathan Jantsch.

**Validation:** Patrick Neubert, Peter Linz, Stefan Wagner.

**Visualization:** Patrick Neubert, Jonas Schulte-Schrepping, Anna C. Aschenbrenner, Katrina J. Binger, Stefan Wagner, Jonathan Jantsch.

**Writing – original draft:** Patrick Neubert, Katrina J. Binger, Stefan Wagner, Jonathan Jantsch.

**Writing – review & editing:** Patrick Neubert, Arne Homann, David Wendelborn, Anna-Lorena Bär, Luka Krampert, Maximilian Trum, Agnes Schröder, Stefan Ebner, Andrea Weichselbaum, Valentin Schatz, Peter Linz, Roland Veelken, Jonas Schulte-Schrepping, Anna C. Aschenbrenner, Thomas Quast, Christian Kurts, Sabrina Geisberger, Karl Kunzelmann, Karin Hammer, Katrina J. Binger, Jens Titze, Dominik N. Müller, Waldemar Kolanus, Joachim L. Schultze, Stefan Wagner, Jonathan Jantsch.

## References

1. Jantsch J, Schatz V, Friedrich D, Schroder A, Kopp C, Siegert I, et al. Cutaneous Na<sup>+</sup> storage strengthens the antimicrobial barrier function of the skin and boosts macrophage-driven host defense. *Cell Metab.* 2015; 21(3):493–501. Epub 2015/03/05. <https://doi.org/10.1016/j.cmet.2015.02.003> PMID: [25738463](https://pubmed.ncbi.nlm.nih.gov/25738463/); PubMed Central PMCID: PMC4350016.
2. Matthias J, Maul J, Noster R, Meinel H, Chao YY, Gerstenberg H, et al. Sodium chloride is an ionic checkpoint for human TH2 cells and shapes the atopic skin microenvironment. *Sci Transl Med.* 2019; 11(480). Epub 2019/02/23. <https://doi.org/10.1126/scitranslmed.aau0683> PMID: [30787167](https://pubmed.ncbi.nlm.nih.gov/30787167/).
3. Schwartz L, Guais A, Pooya M, Abolhassani M. Is inflammation a consequence of extracellular hyperosmolarity? *J Inflamm (Lond).* 2009; 6:21. Epub 2009/06/25. <https://doi.org/10.1186/1476-9255-6-21> PMID: [19549308](https://pubmed.ncbi.nlm.nih.gov/19549308/); PubMed Central PMCID: PMC2709204.
4. Machnik A, Neuhofer W, Jantsch J, Dahlmann A, Tammela T, Machura K, et al. Macrophages regulate salt-dependent volume and blood pressure by a vascular endothelial growth factor-C-dependent buffering mechanism. *Nat Med.* 2009; 15(5):545–52. Epub 2009/05/05. <https://doi.org/10.1038/nm.1960> PMID: [19412173](https://pubmed.ncbi.nlm.nih.gov/19412173/).
5. Machnik A, Dahlmann A, Kopp C, Goss J, Wagner H, van Rooijen N, et al. Mononuclear phagocyte system depletion blocks interstitial tonicity-responsive enhancer binding protein/vascular endothelial growth factor C expression and induces salt-sensitive hypertension in rats. *Hypertension.* 2010; 55(3):755–61. Epub 2010/02/10. <https://doi.org/10.1161/HYPERTENSIONAHA.109.143339> PMID: [20142563](https://pubmed.ncbi.nlm.nih.gov/20142563/).
6. Wiig H, Schroder A, Neuhofer W, Jantsch J, Kopp C, Karlsen TV, et al. Immune cells control skin lymphatic electrolyte homeostasis and blood pressure. *J Clin Invest.* 2013; 123(7):2803–15. Epub 2013/06/01. <https://doi.org/10.1172/JCI60113> PMID: [23722907](https://pubmed.ncbi.nlm.nih.gov/23722907/); PubMed Central PMCID: PMC3696542.
7. Aramburu J, Lopez-Rodriguez C. Regulation of Inflammatory Functions of Macrophages and T Lymphocytes by NFAT5. *Front Immunol.* 2019; 10:535. Epub 2019/04/06. <https://doi.org/10.3389/fimmu.2019.00535> PMID: [30949179](https://pubmed.ncbi.nlm.nih.gov/30949179/); PubMed Central PMCID: PMC6435587.
8. Choi SY, Lee-Kwon W, Kwon HM. The evolving role of TonEBP as an immunometabolic stress protein. *Nat Rev Nephrol.* 2020. <https://doi.org/10.1038/s41581-020-0261-1> PMID: [32157251](https://pubmed.ncbi.nlm.nih.gov/32157251/).
9. Berry MR, Mathews RJ, Ferdinand JR, Jing C, Loudon KW, Wlodek E, et al. Renal Sodium Gradient Orchestrates a Dynamic Antibacterial Defense Zone. *Cell.* 2017; 170(5):860–74 e19. Epub 2017/08/15. <https://doi.org/10.1016/j.cell.2017.07.022> PMID: [28803730](https://pubmed.ncbi.nlm.nih.gov/28803730/).
10. Neubert P, Weichselbaum A, Reitering C, Schatz V, Schroder A, Ferdinand JR, et al. HIF1A and NFAT5 coordinate Na<sup>+</sup>-boosted antibacterial defense via enhanced autophagy and autolysosomal targeting. *Autophagy.* 2019:1–18. Epub 2019/04/16. <https://doi.org/10.1080/15548627.2019.1596483> PMID: [30982460](https://pubmed.ncbi.nlm.nih.gov/30982460/).
11. Binger KJ, Gebhardt M, Heinig M, Rintisch C, Schroeder A, Neuhofer W, et al. High salt reduces the activation of IL-4- and IL-13-stimulated macrophages. *J Clin Invest.* 2015; 125(11):4223–38. Epub 2015/10/21. <https://doi.org/10.1172/JCI80919> PMID: [26485286](https://pubmed.ncbi.nlm.nih.gov/26485286/); PubMed Central PMCID: PMC4639967.

12. Ip WK, Medzhitov R. Macrophages monitor tissue osmolarity and induce inflammatory response through NLRP3 and NLRC4 inflammasome activation. *Nat Commun.* 2015; 6:6931. Epub 2015/05/12. <https://doi.org/10.1038/ncomms7931> PMID: 25959047; PubMed Central PMCID: PMC4430126.
13. Zhang WC, Zheng XJ, Du LJ, Sun JY, Shen ZX, Shi C, et al. High salt primes a specific activation state of macrophages, M(Na). *Cell Res.* 2015; 25(8):893–910. Epub 2015/07/25. <https://doi.org/10.1038/cr.2015.87> PMID: 26206316; PubMed Central PMCID: PMC4528058.
14. Zhang WC, Du LJ, Zheng XJ, Chen XQ, Shi C, Chen BY, et al. Elevated sodium chloride drives type I interferon signaling in macrophages and increases antiviral resistance. *J Biol Chem.* 2018; 293(3):1030–9. Epub 2017/12/06. <https://doi.org/10.1074/jbc.M117.805093> PMID: 29203528; PubMed Central PMCID: PMC5777245.
15. Hucke S, Eschborn M, Liebmann M, Herold M, Freise N, Engbers A, et al. Sodium chloride promotes pro-inflammatory macrophage polarization thereby aggravating CNS autoimmunity. *J Autoimmun.* 2016; 67:90–101. Epub 2015/11/21. <https://doi.org/10.1016/j.jaut.2015.11.001> PMID: 26584738.
16. Heng TS, Painter MW. The Immunological Genome Project: networks of gene expression in immune cells. *Nature immunology.* 2008; 9(10):1091–4. Epub 2008/09/19. <https://doi.org/10.1038/ni1008-1091> PMID: 18800157.
17. Iwamoto T, Watano T, Shigekawa M. A Novel Isothiourea Derivative Selectively Inhibits the Reverse Mode of Na<sup>+</sup>/Ca<sup>2+</sup> Exchange in Cells Expressing NCX1. *Journal of Biological Chemistry.* 1996; 271(37):22391–7. <https://doi.org/10.1074/jbc.271.37.22391> PMID: 8798401
18. Matsuda T, Arakawa N, Takuma K, Kishida Y, Kawasaki Y, Sakaue M, et al. SEA0400, a Novel and Selective Inhibitor of the Na<sup>+</sup>-Ca<sup>2+</sup> Exchanger, Attenuates Reperfusion Injury in the in Vitro and in Vivo Cerebral Ischemic Models. *Journal of Pharmacology and Experimental Therapeutics.* 2001; 298(1):249–56. PMID: 11408549
19. Kimura J, Miyamae S, Noma A. Identification of sodium-calcium exchange current in single ventricular cells of guinea-pig. *J Physiol.* 1987; 384:199–222. <https://doi.org/10.1113/jphysiol.1987.sp016450> PMID: 2443659.
20. Donnadiou E, Trautmann A. Is there a Na<sup>+</sup>/Ca<sup>2+</sup> exchanger in macrophages and in lymphocytes? *Pflügers Arch.* 1993; 424(5–6):448–55. Epub 1993/09/01. <https://doi.org/10.1007/BF00374907> PMID: 8255728.
21. Staiano RI, Granata F, Secondo A, Petraroli A, Loffredo S, Frattini A, et al. Expression and function of Na<sup>+</sup>/Ca<sup>2+</sup> exchangers 1 and 3 in human macrophages and monocytes. *Eur J Immunol.* 2009; 39(5):1405–18. Epub 2009/04/08. <https://doi.org/10.1002/eji.200838792> PMID: 19350557.
22. Blaustein MP, Lederer WJ. Sodium/calcium exchange: its physiological implications. *Physiol Rev.* 1999; 79(3):763–854. Epub 1999/07/03. <https://doi.org/10.1152/physrev.1999.79.3.763> PMID: 10390518.
23. Gerth A, Grosche J, Nieber K, Hauschildt S. Intracellular LPS inhibits the activity of potassium channels and fails to activate NFκB in human macrophages. *J Cell Physiol.* 2005; 202(2):442–52. Epub 2004/09/25. <https://doi.org/10.1002/jcp.20146> PMID: 15389581.
24. Ypey DL, Clapham DE. Development of a delayed outward-rectifying K<sup>+</sup> conductance in cultured mouse peritoneal macrophages. *Proc Natl Acad Sci U S A.* 1984; 81(10):3083–7. Epub 1984/05/01. <https://doi.org/10.1073/pnas.81.10.3083> PMID: 6328495; PubMed Central PMCID: PMC345225.
25. Baartscheer A, Schumacher CA, Coronel R, Fiolet JW. The Driving Force of the Na/Ca-Exchanger during Metabolic Inhibition. *Front Physiol.* 2011; 2:10. <https://doi.org/10.3389/fphys.2011.00010> PMID: 21483726; PubMed Central PMCID: PMC3070476.
26. Young JD, Unkeless JC, Kaback HR, Cohn ZA. Macrophage membrane potential changes associated with gamma 2b/gamma 1 Fc receptor-ligand binding. *Proc Natl Acad Sci U S A.* 1983; 80(5):1357–61. Epub 1983/03/01. <https://doi.org/10.1073/pnas.80.5.1357> PMID: 6219390; PubMed Central PMCID: PMC393596.
27. Gallin EK, Gallin JI. Interaction of chemotactic factors with human macrophages. Induction of transmembrane potential changes. *J Cell Biol.* 1977; 75(1):277–89. Epub 1977/10/01. <https://doi.org/10.1083/jcb.75.1.277> PMID: 410816; PubMed Central PMCID: PMC2111555.
28. Gallin EK, Livengood DR. Nonlinear current-voltage relationships in cultured macrophages. *J Cell Biol.* 1980; 85(1):160–5. Epub 1980/04/01. <https://doi.org/10.1083/jcb.85.1.160> PMID: 7364871; PubMed Central PMCID: PMC2110601.
29. Hanley PJ, Musset B, Renigunta V, Limberg SH, Dalpke AH, Sus R, et al. Extracellular ATP induces oscillations of intracellular Ca<sup>2+</sup> and membrane potential and promotes transcription of IL-6 in macrophages. *Proc Natl Acad Sci U S A.* 2004; 101(25):9479–84. Epub 2004/06/15. <https://doi.org/10.1073/pnas.0400733101> PMID: 15194822; PubMed Central PMCID: PMC439002.

30. Hulsmans M, Clauss S, Xiao L, Aguirre AD, King KR, Hanley A, et al. Macrophages Facilitate Electrical Conduction in the Heart. *Cell*. 2017; 169(3):510–22 e20. Epub 2017/04/22. <https://doi.org/10.1016/j.cell.2017.03.050> PMID: 28431249; PubMed Central PMCID: PMC5474950.
31. Philipson KD, Nicoll DA. Sodium-calcium exchange: a molecular perspective. *Annu Rev Physiol*. 2000; 62:111–33. Epub 2000/06/09. <https://doi.org/10.1146/annurev.physiol.62.1.111> PMID: 10845086.
32. Masek KS, Fiore J, Leitges M, Yan SF, Freedman BD, Hunter CA. Host cell Ca<sup>2+</sup> and protein kinase C regulate innate recognition of *Toxoplasma gondii*. *J Cell Sci*. 2006; 119(Pt 21):4565–73. Epub 2006/11/01. <https://doi.org/10.1242/jcs.03206> PMID: 17074836.
33. Shinomiya H, Nakano M. Calcium ionophore A23187 does not stimulate lipopolysaccharide nonresponsive C3H/HeJ peritoneal macrophages to produce interleukin 1. *J Immunol*. 1987; 139(8):2730–6. Epub 1987/10/15. PubMed PMID: 3116092.
34. Vaeth M, Zee I, Concepcion AR, Maus M, Shaw P, Portal-Celhay C, et al. Ca<sup>2+</sup> Signaling but Not Store-Operated Ca<sup>2+</sup> Entry Is Required for the Function of Macrophages and Dendritic Cells. *J Immunol*. 2015; 195(3):1202–17. <https://doi.org/10.4049/jimmunol.1403013> PMID: 26109647; PubMed Central PMCID: PMC4506881.
35. Treiman M, Caspersen C, Christensen SB. A tool coming of age: thapsigargin as an inhibitor of sarcoplasmic reticulum Ca<sup>2+</sup>-ATPases. *Trends Pharmacol Sci*. 1998; 19(4):131–5. [https://doi.org/10.1016/s0165-6147\(98\)01184-5](https://doi.org/10.1016/s0165-6147(98)01184-5) PMID: 9612087.
36. Amran MS, Homma N, Hashimoto K. Pharmacology of KB-R7943: a Na<sup>+</sup>-Ca<sup>2+</sup> exchange inhibitor. *Cardiovasc Drug Rev*. 2003; 21(4):255–76. Epub 2003/12/04. <https://doi.org/10.1111/j.1527-3466.2003.tb00121.x> PMID: 14647531.
37. Kimura S, Noda T, Yoshimori T. Dissection of the Autophagosome Maturation Process by a Novel Reporter Protein, Tandem Fluorescent-Tagged LC3. *Autophagy*. 2007; 3(5):452–60. <https://doi.org/10.4161/auto.4451> PMID: 17534139
38. Muller DN, Wilck N, Haase S, Kleinewietfeld M, Linker RA. Sodium in the microenvironment regulates immune responses and tissue homeostasis. *Nat Rev Immunol*. 2019; 19(4):243–54. Epub 2019/01/16. <https://doi.org/10.1038/s41577-018-0113-4> PMID: 30644452.
39. Schatz V, Neubert P, Schroder A, Binger K, Gebhard M, Muller DN, et al. Elementary immunology: Na<sup>+</sup> (+) as a regulator of immunity. *Pediatr Nephrol*. 2017; 32(2):201–10. Epub 2016/02/28. <https://doi.org/10.1007/s00467-016-3349-x> PMID: 26921211; PubMed Central PMCID: PMC5203836.
40. Gurusamy D, Clever D, Eil R, Restifo NP. Novel "Elements" of Immune Suppression within the Tumor Microenvironment. *Cancer Immunol Res*. 2017; 5(6):426–33. <https://doi.org/10.1158/2326-6066.CIR-17-0117> PMID: 28576921; PubMed Central PMCID: PMC5512605.
41. Han J, Lee JD, Bibbs L, Ulevitch RJ. A MAP kinase targeted by endotoxin and hyperosmolarity in mammalian cells. *Science*. 1994; 265(5173):808–11. Epub 1994/08/05. <https://doi.org/10.1126/science.7914033> PMID: 7914033.
42. Lopez-Rodriguez C, Aramburu J, Rakeman AS, Rao A. NFAT5, a constitutively nuclear NFAT protein that does not cooperate with Fos and Jun. *Proc Natl Acad Sci U S A*. 1999; 96(13):7214–9. Epub 1999/06/23. <https://doi.org/10.1073/pnas.96.13.7214> PMID: 10377394; PubMed Central PMCID: PMC22056.
43. Miyakawa H, Woo SK, Dahl SC, Handler JS, Kwon HM. Tonicity-responsive enhancer binding protein, a rel-like protein that stimulates transcription in response to hypertonicity. *Proceedings of the National Academy of Sciences of the United States of America*. 1999; 96(5):2538–42. <https://doi.org/10.1073/pnas.96.5.2538> PMID: 10051678.
44. Ko BCB, Turck CW, Lee KWY, Yang Y, Chung SSM. Purification, Identification, and Characterization of an Osmotic Response Element Binding Protein. *Biochemical and Biophysical Research Communications*. 2000; 270(1):52–61. <https://doi.org/10.1006/bbrc.2000.2376> PMID: 10733904
45. West AP, Brodsky IE, Rahner C, Woo DK, Erdjument-Bromage H, Tempst P, et al. TLR signalling augments macrophage bactericidal activity through mitochondrial ROS. *Nature*. 2011; 472(7344):476–80. Epub 2011/04/29. <https://doi.org/10.1038/nature09973> PMID: 21525932; PubMed Central PMCID: PMC3460538.
46. Black JA, Waxman SG. Noncanonical roles of voltage-gated sodium channels. *Neuron*. 2013; 80(2):280–91. Epub 2013/10/22. <https://doi.org/10.1016/j.neuron.2013.09.012> PMID: 24139034.
47. Barbaro NR, Foss JD, Kryshchal DO, Tsyba N, Kumaresan S, Xiao L, et al. Dendritic Cell Amiloride-Sensitive Channels Mediate Sodium-Induced Inflammation and Hypertension. *Cell Rep*. 2017; 21(4):1009–20. Epub 2017/10/27. <https://doi.org/10.1016/j.celrep.2017.10.002> PMID: 29069584; PubMed Central PMCID: PMC5674815.
48. Cahalan MD, Chandy KG. The functional network of ion channels in T lymphocytes. *Immunol Rev*. 2009; 231(1):59–87. Epub 2009/09/17. <https://doi.org/10.1111/j.1600-065X.2009.00816.x> PMID: 19754890; PubMed Central PMCID: PMC3133616.

49. Westphalen K, Gusarova GA, Islam MN, Subramanian M, Cohen TS, Prince AS, et al. Sessile alveolar macrophages communicate with alveolar epithelium to modulate immunity. *Nature*. 2014; 506(7489):503–6. Epub 2014/01/28. <https://doi.org/10.1038/nature12902> PMID: 24463523; PubMed Central PMCID: PMC4117212.
50. Nurbaeva MK, Schmid E, Szteyn K, Yang W, Viollet B, Shumilina E, et al. Enhanced Ca(2+)(+) entry and Na+/Ca(2+)(+) exchanger activity in dendritic cells from AMP-activated protein kinase-deficient mice. *FASEB J*. 2012; 26(7):3049–58. <https://doi.org/10.1096/fj.12-204024> PMID: 22474243.
51. Decuypere JP, Bultynck G, Parys JB. A dual role for Ca(2+) in autophagy regulation. *Cell Calcium*. 2011; 50(3):242–50. Epub 2011/05/17. <https://doi.org/10.1016/j.ceca.2011.04.001> PMID: 21571367.
52. Kondratskiy A, Kondratska K, Skryma R, Klionsky DJ, Prevarskaya N. Ion channels in the regulation of autophagy. *Autophagy*. 2018; 14(1):3–21. Epub 2017/10/06. <https://doi.org/10.1080/15548627.2017.1384887> PMID: 28980859; PubMed Central PMCID: PMC5846505.
53. Freeman SA, Uderhardt S, Saric A, Collins RF, Buckley CM, Mylvaganam S, et al. Lipid-gated monovalent ion fluxes regulate endocytic traffic and support immune surveillance. *Science*. 2020; 367(6475):301–5. <https://doi.org/10.1126/science.aaw9544> PMID: 31806695.
54. Bentley PJ. Amiloride: a potent inhibitor of sodium transport across the toad bladder. *J Physiol*. 1968; 195(2):317–30. <https://doi.org/10.1113/jphysiol.1968.sp008460> PMID: 5647323.
55. Vigne P, Frelin C, Cragoe EJ, Lazdunski M. Structure-activity relationships of amiloride and certain of its analogues in relation to the blockade of the Na+/H+ exchange system. *Molecular Pharmacology*. 1984; 25(1):131–6. PMID: 6323947
56. Thorneloe KS, Cheung M, Bao W, Alsaïd H, Lenhard S, Jian M-Y, et al. An Orally Active TRPV4 Channel Blocker Prevents and Resolves Pulmonary Edema Induced by Heart Failure. *Science Translational Medicine*. 2012; 4(159):159ra48–ra48. <https://doi.org/10.1126/scitranslmed.3004276>
57. Takata M, Moore JW, Kao CY, Fuhrman FA. Blockage of sodium conductance increase in lobster giant axon by tarichatoxin (tetrodotoxin). *J Gen Physiol*. 1966; 49(5):977–88. <https://doi.org/10.1085/jgp.49.5.977> PMID: 5961361.
58. Hoffman JF, Kregenow FM. The Characterization of New Energy Dependent Cation Transport Processes in Red Blood Cells. *Annals of the New York Academy of Sciences*. 1966; 137(2):566–76. <https://doi.org/10.1111/j.1749-6632.1966.tb50182.x> PMID: 5229816
59. Chen X, Qiu L, Li M, Dürrnagel S, Orser BA, Xiong Z-G, et al. Diarylamidines: high potency inhibitors of acid-sensing ion channels. *Neuropharmacology*. 2010; 58(7):1045–53. Epub 2010/01/28. <https://doi.org/10.1016/j.neuropharm.2010.01.011> PMID: 20114056.
60. Schleicher U, Bogdan C. Generation, culture and flow-cytometric characterization of primary mouse macrophages. *Methods Mol Biol*. 2009; 531:203–24. Epub 2009/04/07. [https://doi.org/10.1007/978-1-59745-396-7\\_14](https://doi.org/10.1007/978-1-59745-396-7_14) PMID: 19347320.
61. Siegert I, Schatz V, Prechtel AT, Steinkasserer A, Bogdan C, Jantsch J. Electroporation of siRNA into Mouse Bone Marrow-Derived Macrophages and Dendritic Cells. In: Li S, Cutrera J, Heller R, Teissie J, editors. *Electroporation Protocols: Preclinical and Clinical Gene Medicine*. New York, NY: Springer New York; 2014. p. 111–9.
62. Mustroph J, Wagemann O, Lucht CM, Trum M, Hammer KP, Sag CM, et al. Empagliflozin reduces Ca/calmodulin-dependent kinase II activity in isolated ventricular cardiomyocytes. *ESC heart failure*. 2018; 5(4):642–8. <https://doi.org/10.1002/ehf2.12336> PMID: 30117720.
63. June CH, Abe R, Rabinovitch PS. Measurement of Intracellular Ions by Flow Cytometry. *Current Protocols in Immunology*. 1995; 14(1):5–21. <https://doi.org/10.1002/0471142735.im0505s14>
64. Hamill OP, Marty A, Neher E, Sakmann B, Sigworth FJ. Improved patch-clamp techniques for high-resolution current recording from cells and cell-free membrane patches. *Pflugers Arch*. 1981; 391(2):85–100. Epub 1981/08/01. <https://doi.org/10.1007/BF00656997> PMID: 6270629.
65. Perteau M, Kim D, Perteau GM, Leek JT, Salzberg SL. Transcript-level expression analysis of RNA-seq experiments with HISAT, StringTie and Ballgown. *Nat Protoc*. 2016; 11(9):1650–67. Epub 2016/08/26. <https://doi.org/10.1038/nprot.2016.095> PMID: 27560171; PubMed Central PMCID: PMC5032908.
66. Frazee AC, Perteau G, Jaffe AE, Langmead B, Salzberg SL, Leek JT. Ballgown bridges the gap between transcriptome assembly and expression analysis. *Nat Biotechnol*. 2015; 33(3):243–6. Epub 2015/03/10. <https://doi.org/10.1038/nbt.3172> PMID: 25748911; PubMed Central PMCID: PMC4792117.
